# Supplementary material for: 3-Pyridylvinyl benzoxazole-derived multifunctional organic materials—from solid-state photoreactivity to photophysical and electrochemical properties
Source: Royal Society of Chemistry journal article supplement (doi:10.1039/d4nj00190g), 2024-01-01
Supplement: d4nj00190g1.pdf [file d4nj00190g1.pdf]

## **Supporting Information**

### **3-Pyridylvinyl benzoxazole derived multifunctional organic materials - from solid state photoreactivity to photophysical and electrochemical properties**

**Shyamvarnan Baskar and Goutam Kumar Kole\***

Department of Chemistry, College of Engineering and Technology, SRM Institute of Science and Technology,  
Kattankulathur, Tamil Nadu 603203, India. Email: [goutamks@srmist.edu.in](mailto:goutamks@srmist.edu.in)

# 1. Crystallography

Table S1: Crystallographic data

|                                                                      | <b>3-PVBO</b>                                    | <b>[3-MPVBO]I</b>                                               | <b>[3-MPVBO](OTf)</b>                                                          | <b>PBOCB</b>                                                  |
|----------------------------------------------------------------------|--------------------------------------------------|-----------------------------------------------------------------|--------------------------------------------------------------------------------|---------------------------------------------------------------|
| CCDC number                                                          | 2306976                                          | 2306977                                                         | 2306978                                                                        | 2306979                                                       |
| Empirical formula                                                    | C <sub>14</sub> H <sub>10</sub> N <sub>2</sub> O | C <sub>15</sub> H <sub>13</sub> N <sub>2</sub> O <sub>3</sub> I | C <sub>16</sub> H <sub>13</sub> F <sub>3</sub> N <sub>2</sub> O <sub>4</sub> S | C <sub>28</sub> H <sub>20</sub> N <sub>4</sub> O <sub>2</sub> |
| Formula weight<br>(g.mol <sup>-1</sup> )                             | 222.24                                           | 396.17                                                          | 386.34                                                                         | 444.48                                                        |
| Temperature (K)                                                      | 295 K                                            | 286 K                                                           | 295 K                                                                          | 296 K                                                         |
| Radiation, λ (Å)                                                     | Mo-Kα<br>(λ = 0.71073)                           | Mo-Kα (λ =<br>0.71073)                                          | Mo-Kα (λ =<br>0.71073)                                                         | Mo-Kα (λ =<br>0.71073)                                        |
| Crystal Colour, habit                                                | Block, Colourless                                | Block,<br>Colourless                                            | Block, colourless                                                              | Block,<br>colourless                                          |
| Crystal size (mm <sup>3</sup> )                                      | 0.400 × 0.220 ×<br>0.210                         | 0.260 × 0.150 ×<br>0.130                                        | 0.360 × 0.210 ×<br>0.100                                                       | 0.250 × 0.180<br>× 0.140                                      |
| Crystal system                                                       | monoclinic                                       | monoclinic                                                      | triclinic                                                                      | triclinic                                                     |
| Space group                                                          | <i>P</i> 2 <sub>1</sub> / <i>n</i>               | <i>P</i> 2 <sub>1</sub> / <i>n</i>                              | <i>P</i> $\bar{1}$                                                             | <i>P</i> $\bar{1}$                                            |
| Unit cell dimensions                                                 |                                                  |                                                                 |                                                                                |                                                               |
| <i>a</i> (Å)                                                         | 6.5833(13)                                       | 7.203(3)                                                        | 6.6963(6)                                                                      | 6.4328(15)                                                    |
| <i>b</i> (Å)                                                         | 13.825(3)                                        | 16.679(7)                                                       | 7.3887(6)                                                                      | 9.342(3)                                                      |
| <i>c</i> (Å)                                                         | 24.715(9)                                        | 13.419(6)                                                       | 17.6221(16)                                                                    | 9.841(3)                                                      |
| α (°)                                                                | 90                                               | 90                                                              | 80.201(3)                                                                      | 105.347(8)                                                    |
| β (°)                                                                | 91.627(9)                                        | 92.582(14)                                                      | 81.214(3)                                                                      | 105.020(7)                                                    |
| γ (°)                                                                | 90                                               | 90                                                              | 76.968(3)                                                                      | 91.233(6)                                                     |
| Volume (Å <sup>3</sup> )                                             | 2248.5(11)                                       | 1610.5(12)                                                      | 831.08(13)                                                                     | 548.2(3)                                                      |
| <i>Z</i>                                                             | 8                                                | 4                                                               | 2                                                                              | 1                                                             |
| Calculated density<br>(Mg.m <sup>-3</sup> )                          | 1.313                                            | 1.634                                                           | 1.544                                                                          | 1.346                                                         |
| μ (mm <sup>-1</sup> )                                                | 0.085                                            | 1.999                                                           | 0.252                                                                          | 0.087                                                         |
| F(000)                                                               | 928                                              | 776                                                             | 396                                                                            | 232                                                           |
| θ range (°)                                                          | 2.21 to 27.05                                    | 2.24 to 25.26                                                   | 2.36 to 26.37                                                                  | 2.23 to 27.10                                                 |
| Reflections collected                                                | 39886                                            | 20041                                                           | 24592                                                                          | 16103                                                         |
| Independent<br>reflections                                           | 4600                                             | 2850                                                            | 3392                                                                           | 2215                                                          |
| Parameters/ restraints                                               | 427/228                                          | 355/538                                                         | 292/114                                                                        | 324/692                                                       |
| GooF on F <sup>2</sup>                                               | 1.121                                            | 1.089                                                           | 1.074                                                                          | 1.100                                                         |
| R <sub>1</sub> [ <i>I</i> > 2σ( <i>I</i> )] <sup>a</sup>             | 0.0518(3764)                                     | 0.0957(2071)                                                    | 0.0517(3014)                                                                   | 0.0405(1873)                                                  |
| wR <sub>2</sub> (all data) <sup>b</sup>                              | 0.1215(4600)                                     | 0.2344(2850)                                                    | 0.1371(3392)                                                                   | 0.0975(2215)                                                  |
| Maximum/minimum<br>residual electron<br>density (e.Å <sup>-3</sup> ) | 0.211/-0.140                                     | 2.080/-1.577                                                    | 0.301/ -0.204                                                                  | 0.120/-0.122                                                  |

## 2. Additional crystallographic diagrams

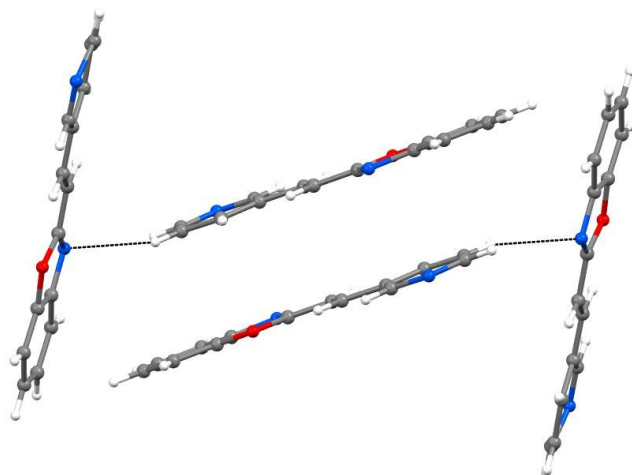

Fig. S1: Arrangement of two types of molecules of **3-PVBO** in its crystal structure. A pair of **3-PVBO** molecules stack in parallel via C-H...N interaction.

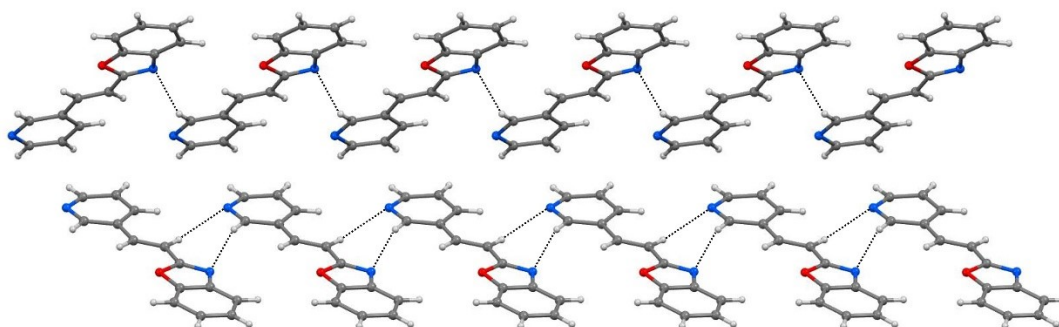

Fig. S2: Arrangement of two types of molecules of **3-PVBO** in its crystal structure via various C-H...N interactions.

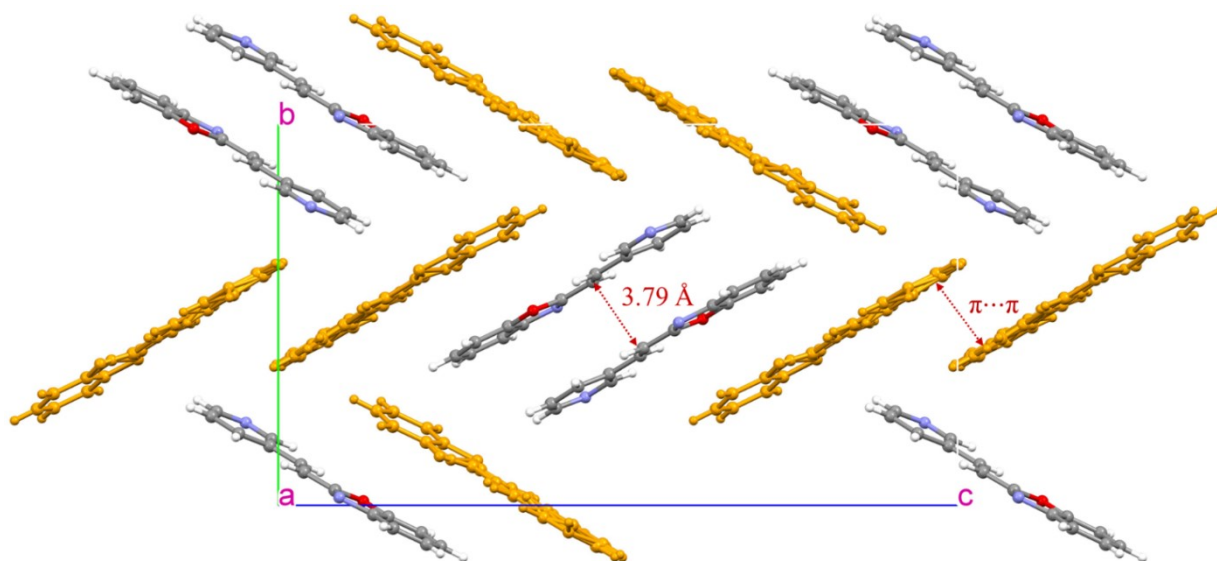

Fig. S3: Crystal packing of two types of **3-PVBO** molecules are shown. The disordered molecules are shown in orange to distinguish them from the other. Only one type (more ordered) of molecules is found to stack in a parallel arrangement, suitable for photodimerization reaction in the solid state.

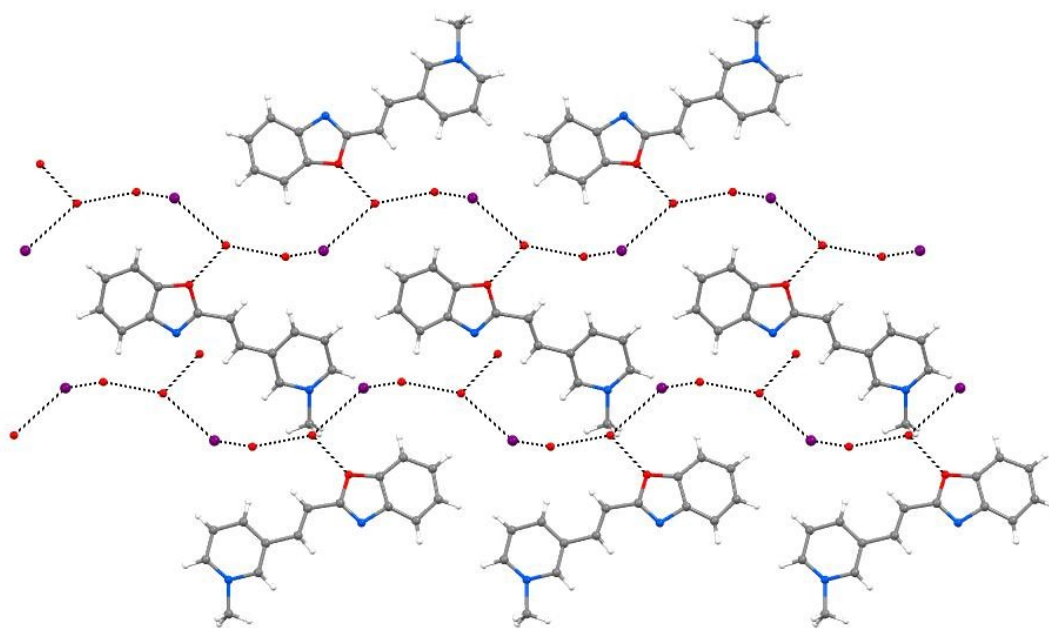

Fig. S4: Crystal packing of **[3-MPVBO]I**, viewed approximately along the *c*-direction, showing hydrogen bonding interaction between **3-MPVBO** cations, lattice water and iodide anions. One-dimensional zig-zag hydrogen bonded network, formed between lattice water and iodide anions, can be observed.

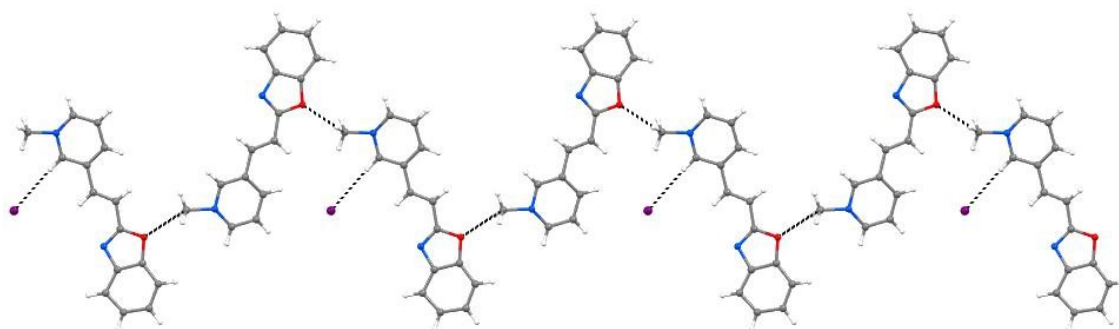

Fig. S5: Crystal packing of **[3-MPVBO]I** showing C–H···O and C–H···I weak interactions, viewed approximately along the *a*-direction.

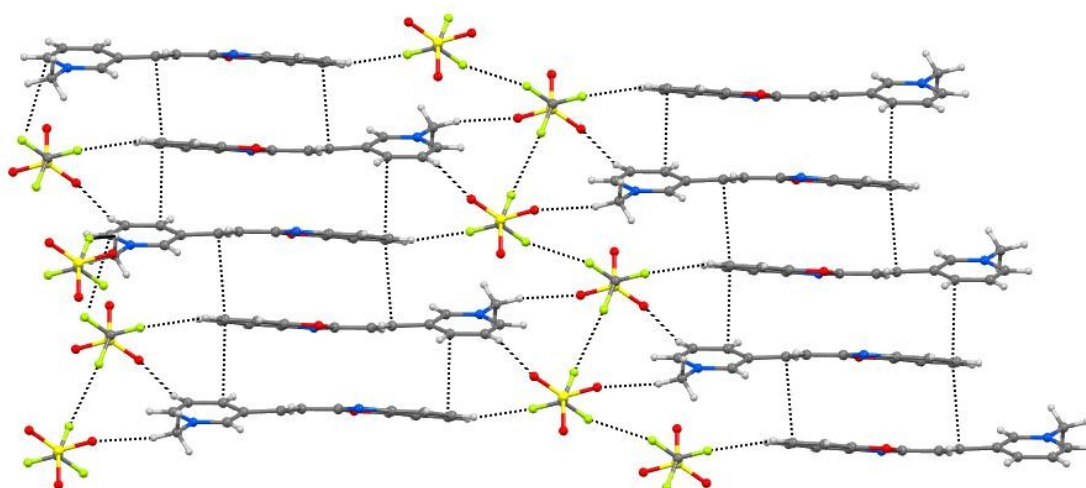

Fig. S6: Crystal packing of **[3-MPVBO](OTf)** showing various weak interactions between **3-MPVBO** cations and triflate anions, viewed approximately along the *a*-direction.

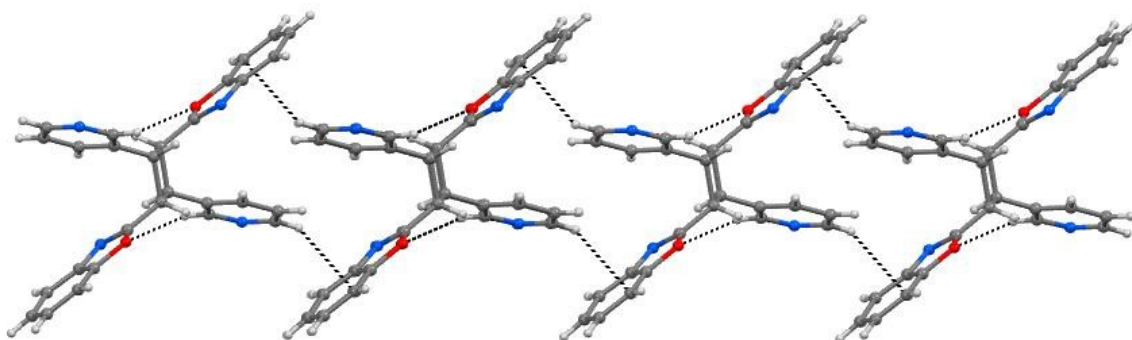

Fig. S7: Crystal packing of **PBOCB** showing C-H...N, C-H...O and C-H... $\pi$  weak interactions, viewed approximately along the *a*-direction.

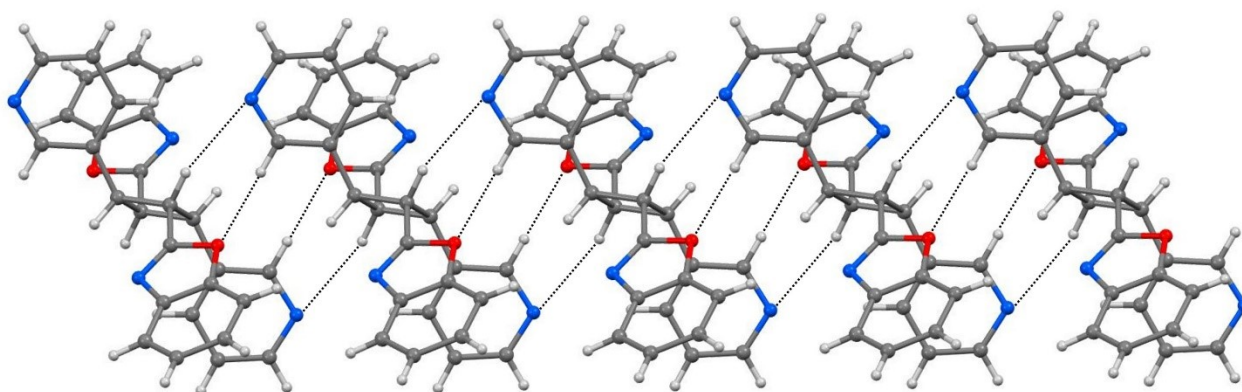

Fig. S8: Crystal packing of **PBOCB** showing intermolecular C-H...N and C-H...O weak interactions, viewed approximately along the *c*-direction.

### 3. Analysis of Hirshfeld surfaces

Plotting of Hirshfeld Surface can be done using a variety of characteristics, including curvedness, electrostatic potential, shaped index, and  $d_{\text{norm}}$  (normalised distance). Here, the HS is mapped using the  $d_{\text{norm}}$  to visually show the interactions using two distinct colours to indicate the direction of acting interactions. Red spots indicate the positions of strong interactions between a pair of neighbouring molecules.

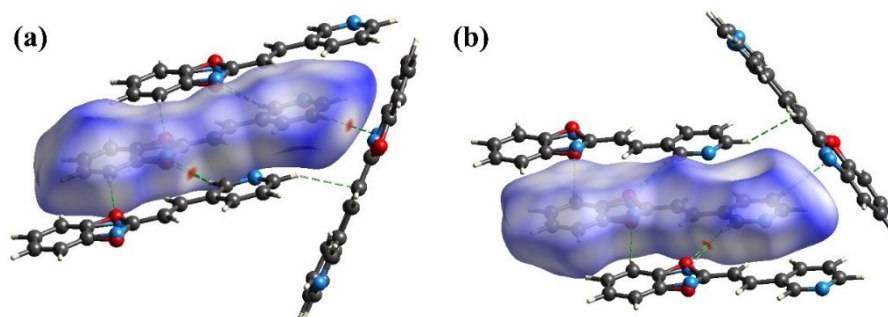

Fig. S9: Hirshfeld surface for **3-PVBO**. The C-H...N are shown in different viewing directions (a) and (b).

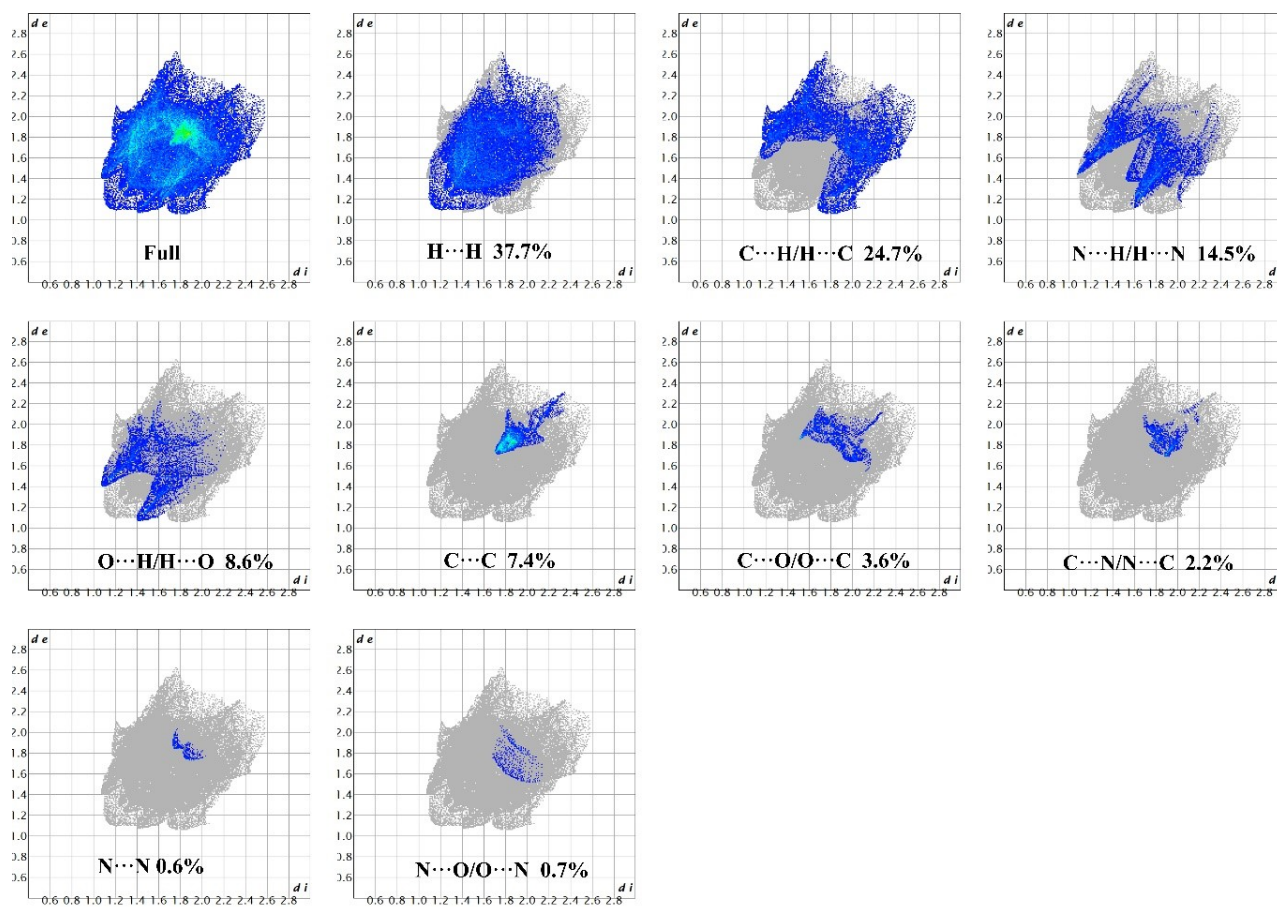

Fig. S10: Full fingerprint plot is resolved for various types of interactions and the percentage of their contributions to the total Hirshfeld surface area is presented for **3-PVBO**.

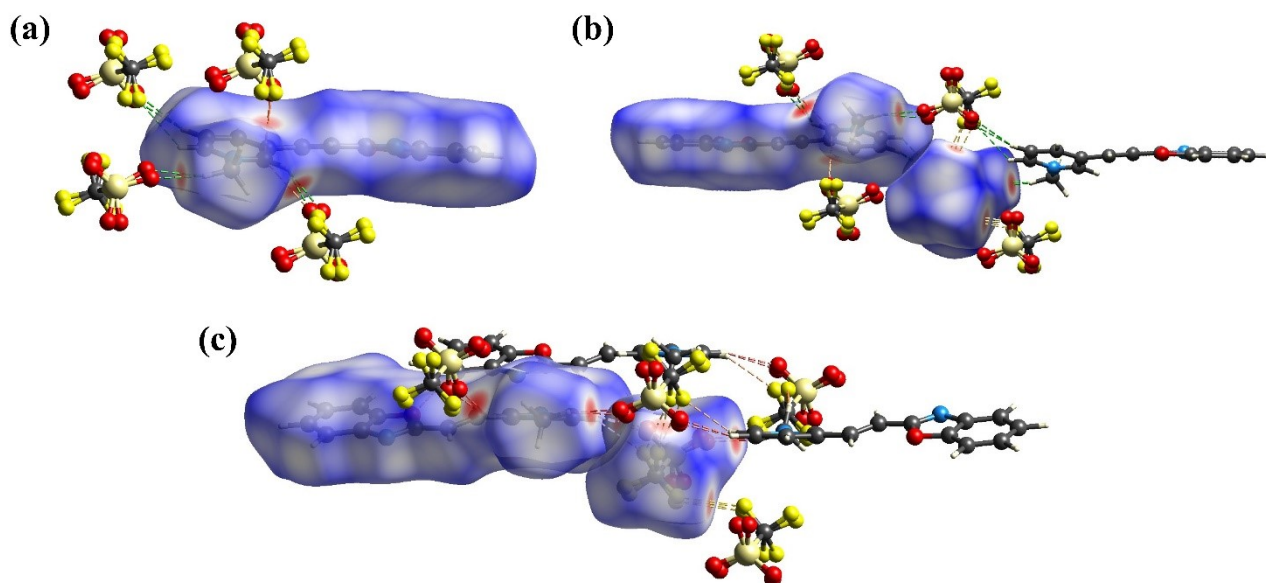

Fig. S11: Hirshfeld surface for [3-MPVBO](OTf). Various interactions like C-H...O, C-H...F between the cation and triflate anion are shown in different angles in (a), (b) and (c).

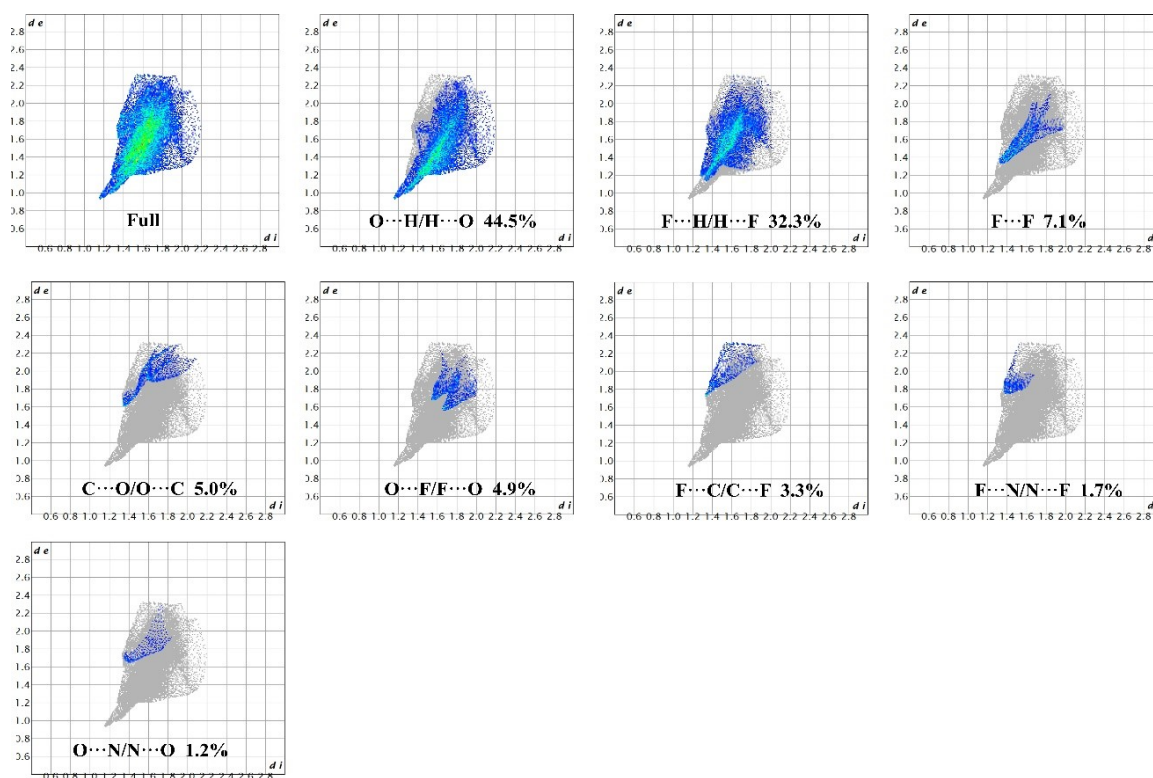

Fig. S12: Full fingerprint plot is resolved for various types of interactions and the percentage of their contributions to the total Hirshfeld surface area is presented for [3-MPVBO](OTf).

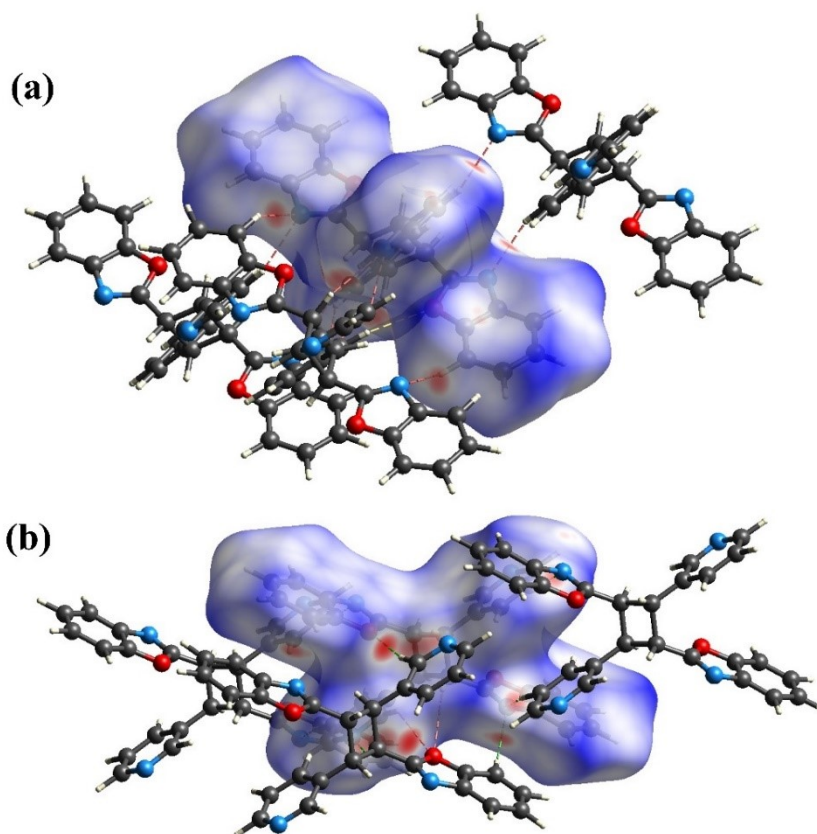

Fig. S13: Hirshfeld surface for **PBOCB**. Various interactions like  $C-H \cdots N$ ,  $C-H \cdots \pi$  are shown in different angles in (a) and (b).

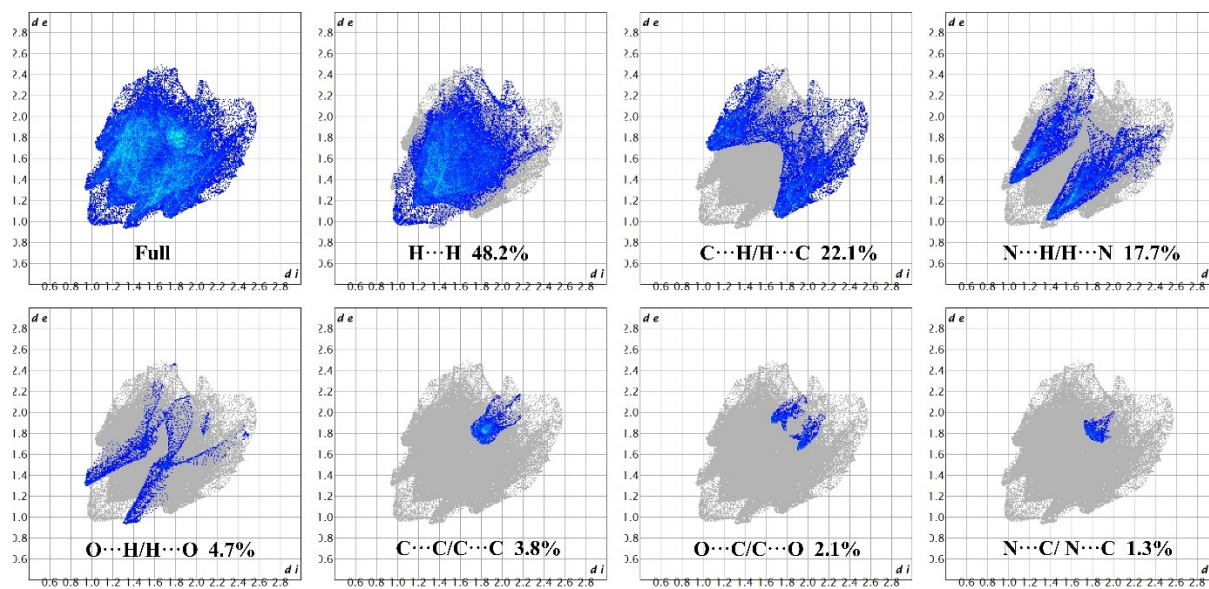

Fig. S14: Full fingerprint plot is resolved for various types of interactions and the percentage of their contributions to the total Hirshfeld surface area is presented for **PBOCB**.



## 4. NMR spectroscopy

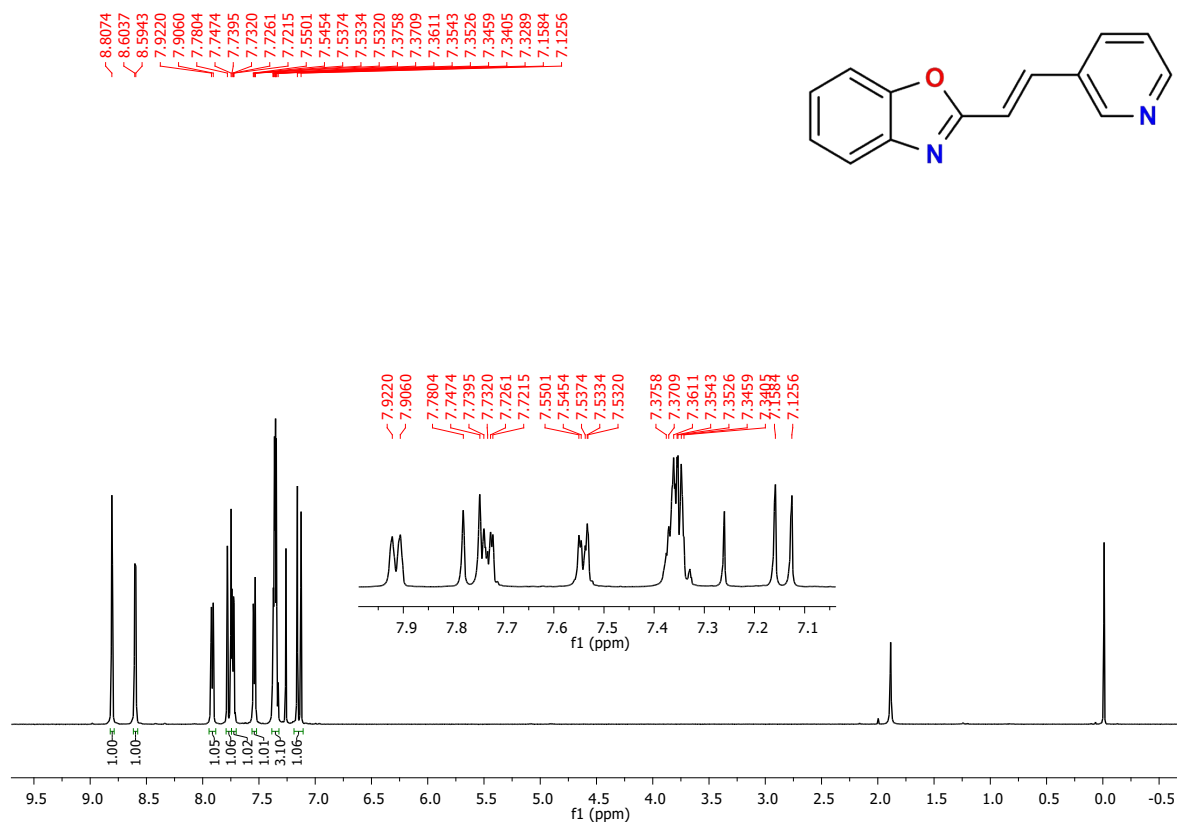

Fig. S15:  $^1\text{H}$  NMR (500 MHz,  $\text{CDCl}_3$ ) spectrum of 3-PVBO.

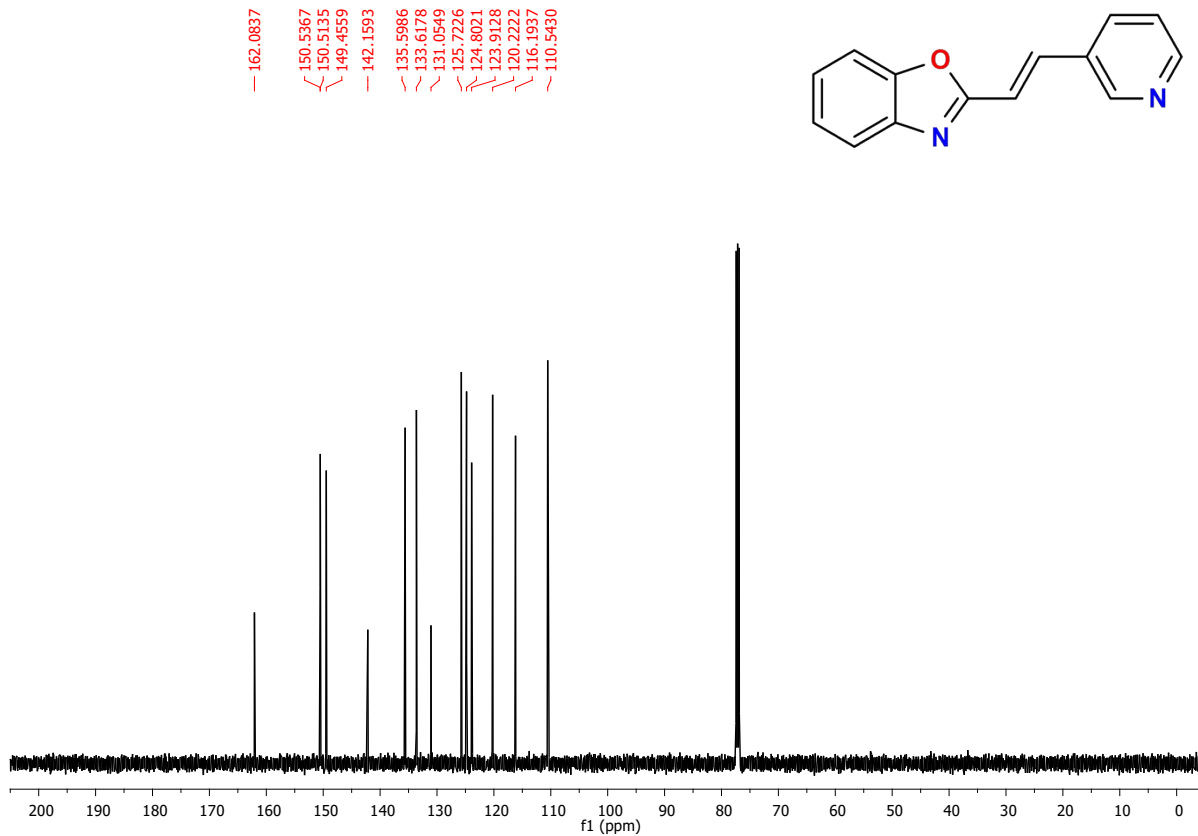

Fig. S16:  $^{13}\text{C}$  NMR (125 MHz,  $\text{CDCl}_3$ ) spectrum of 3-PVBO.

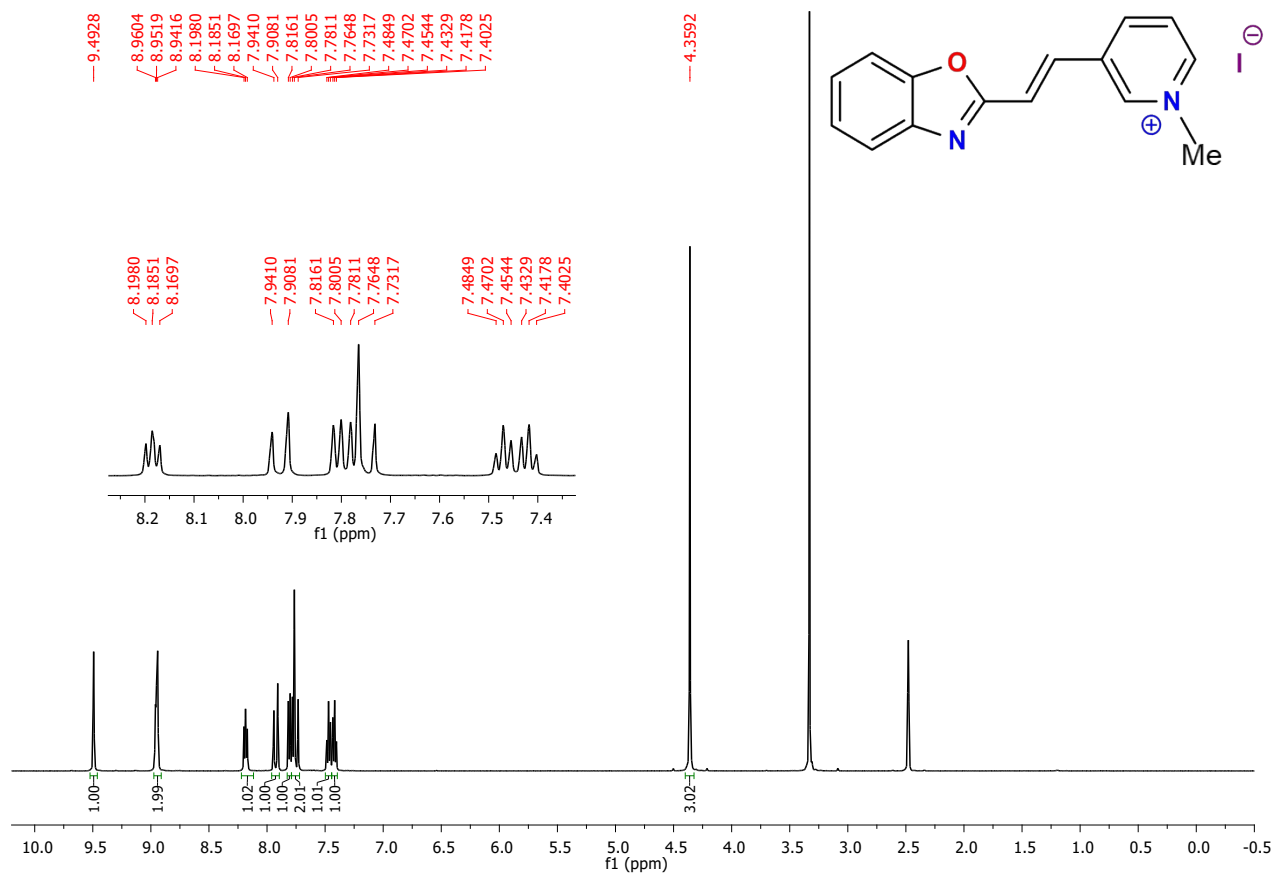

Fig. S17: <sup>1</sup>H NMR (500 MHz, DMSO-*d*<sub>6</sub>) spectrum of [3-MPVBO]I.

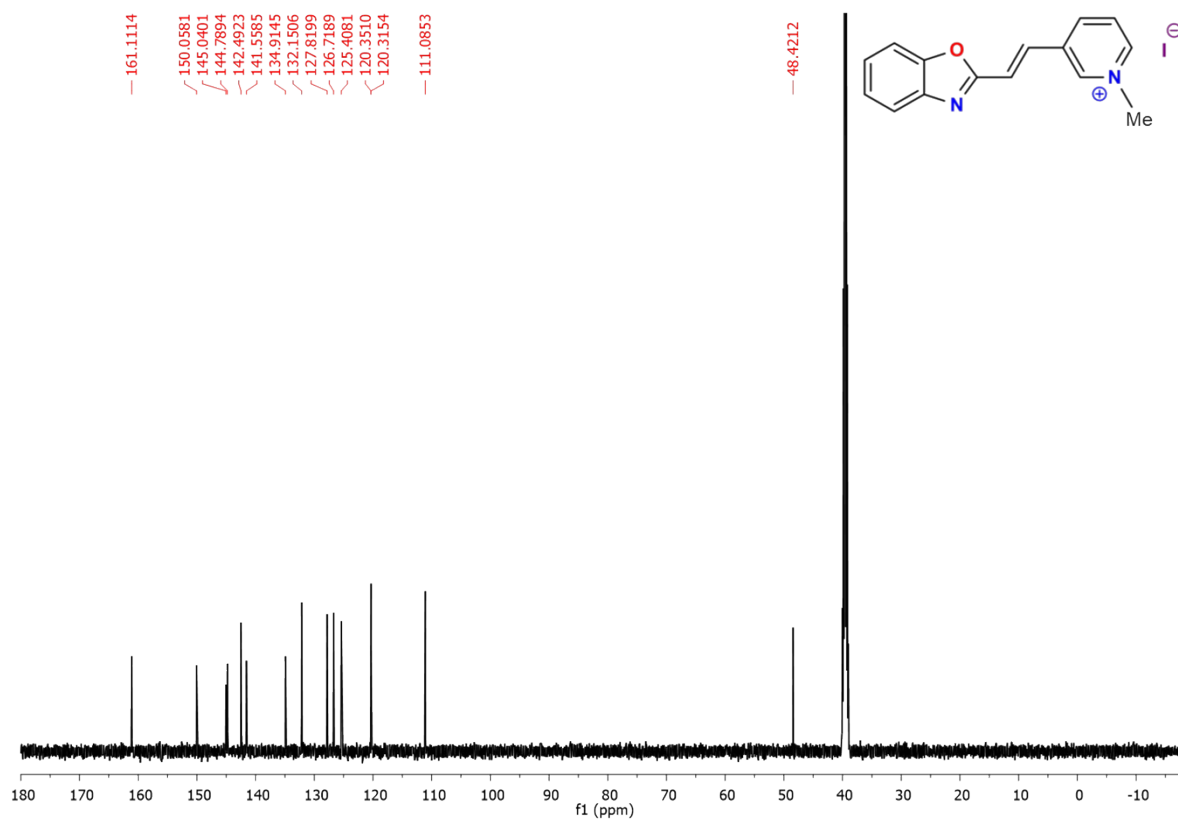

Fig. S18: <sup>13</sup>C NMR (125 MHz, DMSO-*d*<sub>6</sub>) spectrum of [3-MPVBO]I.

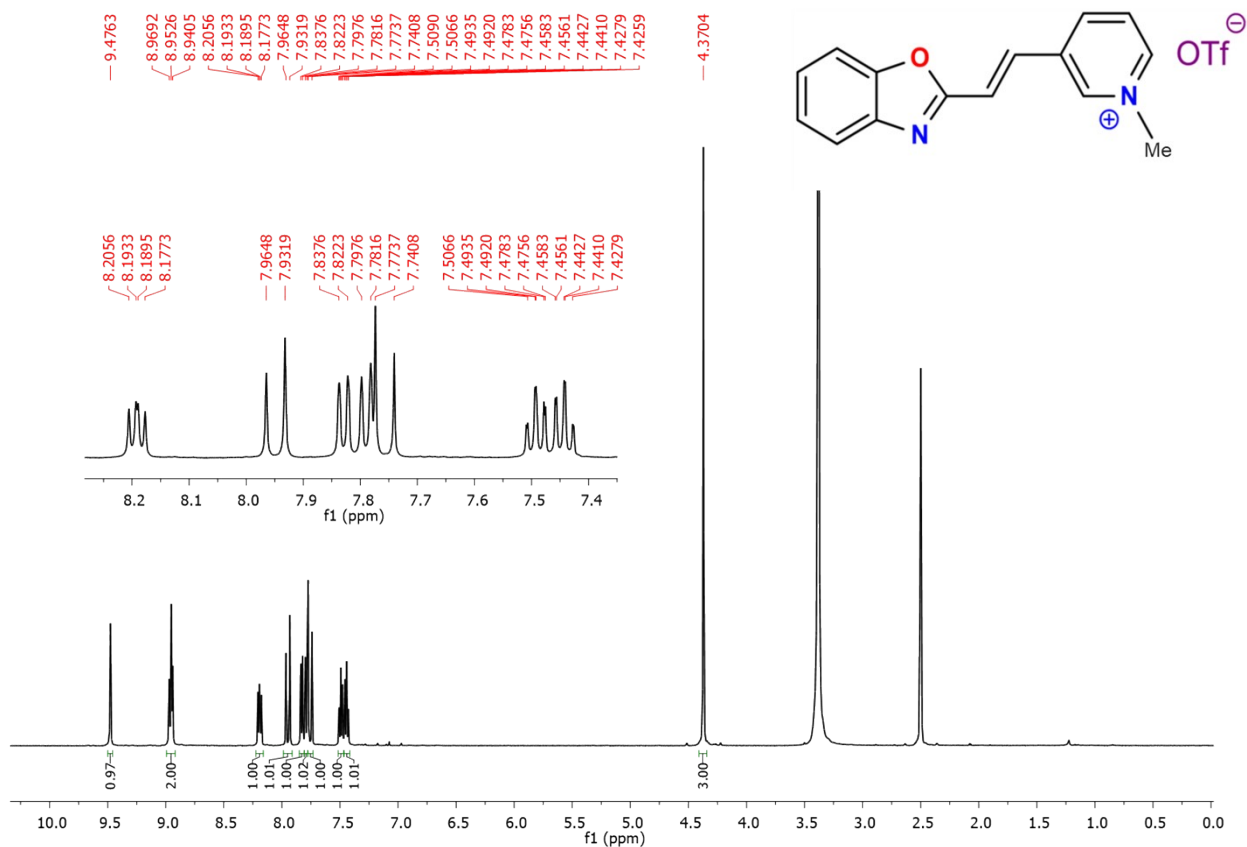

Fig. S19: <sup>1</sup>H NMR (500 MHz, DMSO-*d*<sub>6</sub>) spectrum of [3-MPVBO](OTf).

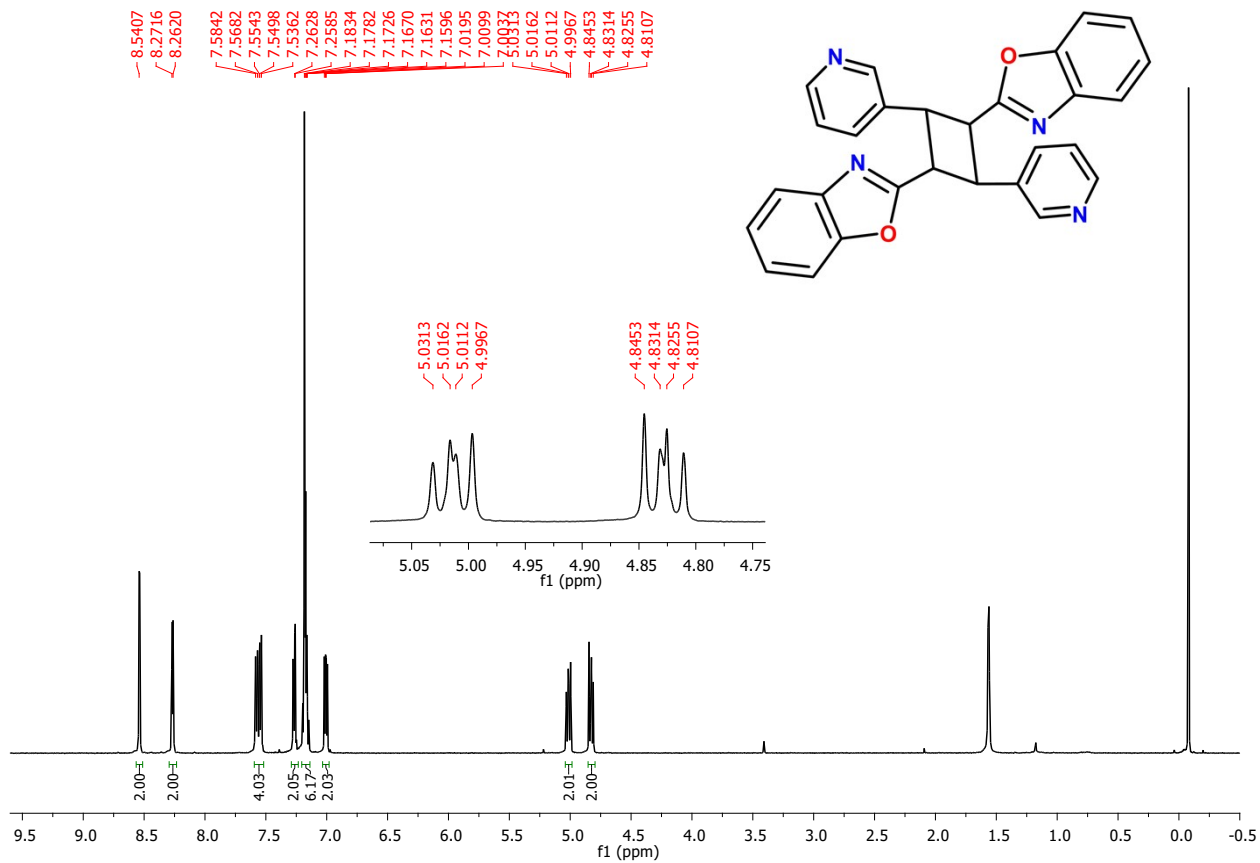

Fig. S20: <sup>1</sup>H NMR (500 MHz, CDCl<sub>3</sub>) spectrum of PBOCB.

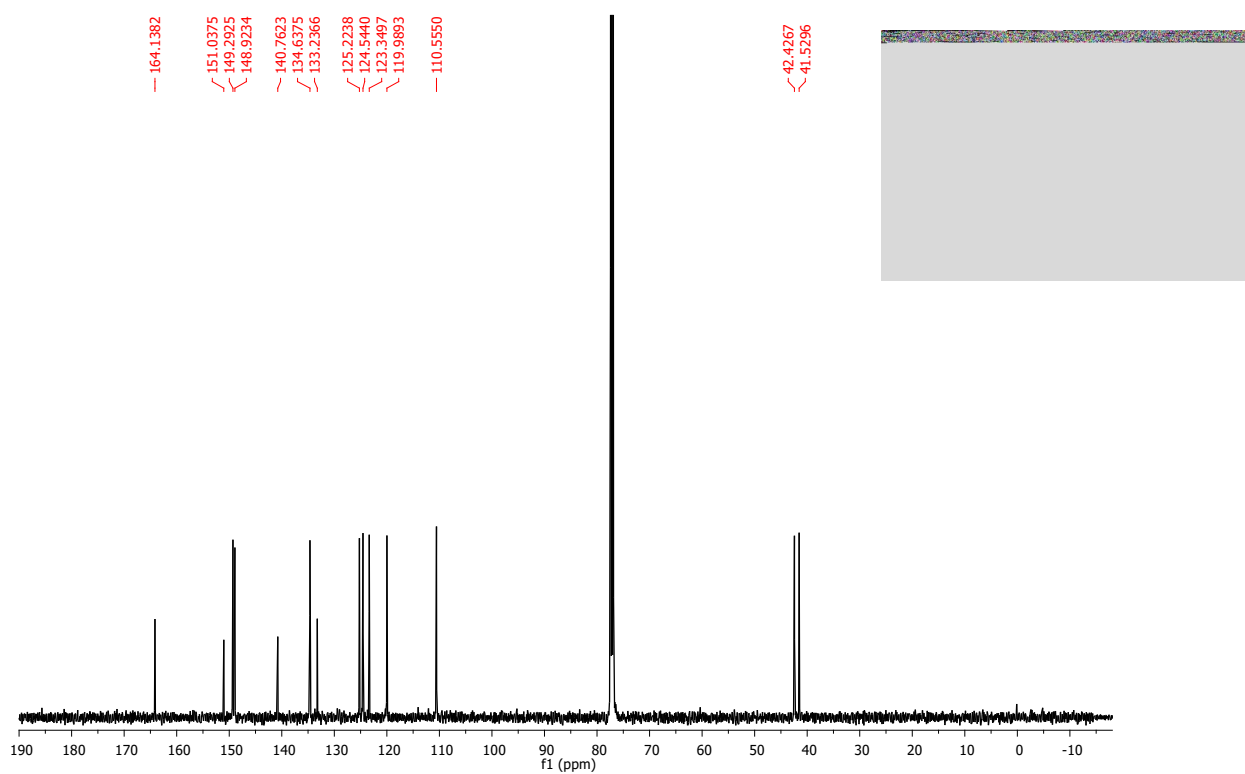

Fig. S21:  $^{13}\text{C}$  NMR (125 MHz,  $\text{CDCl}_3$ ) spectrum of **PBOCB**.

## 5. Mass spectrometry

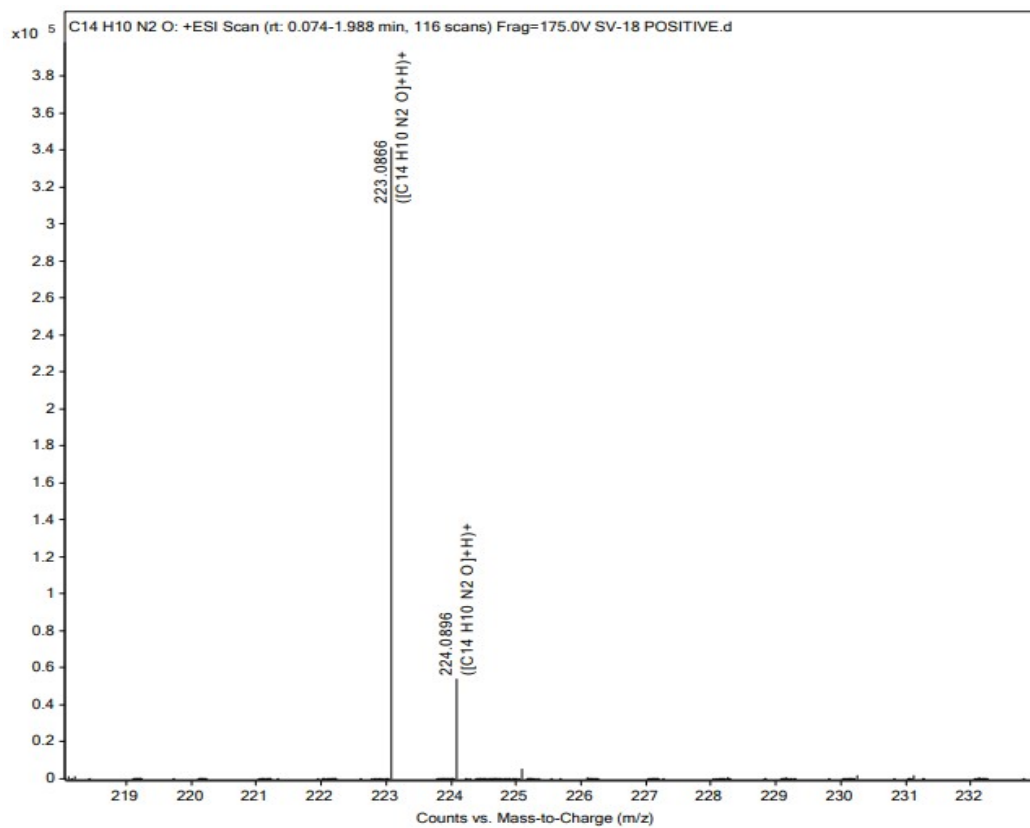

Fig. S22: HR-MS spectrum of **3-PVBO**.

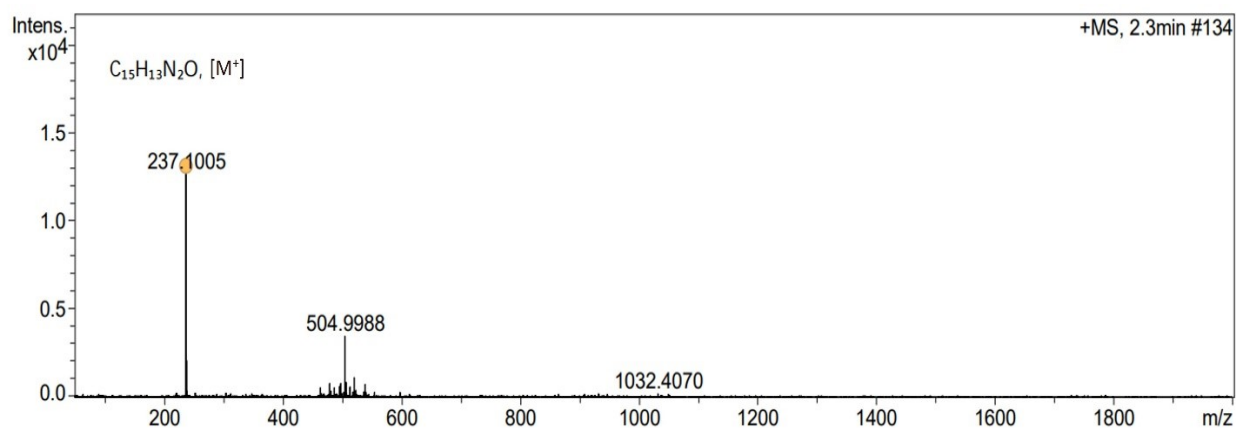

Fig. S23: HR-MS spectrum of [3-MPVBO]I.

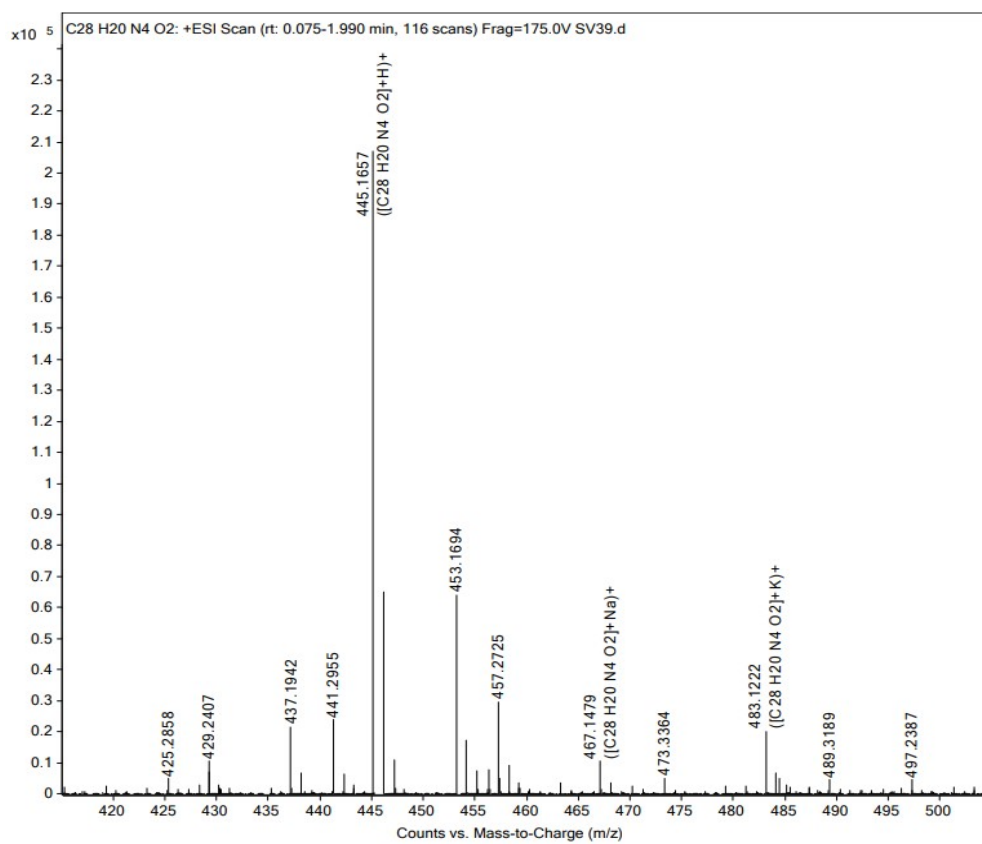

Fig. S24: HR-MS spectrum of PBOCB.

## 6. FT-IR spectroscopy

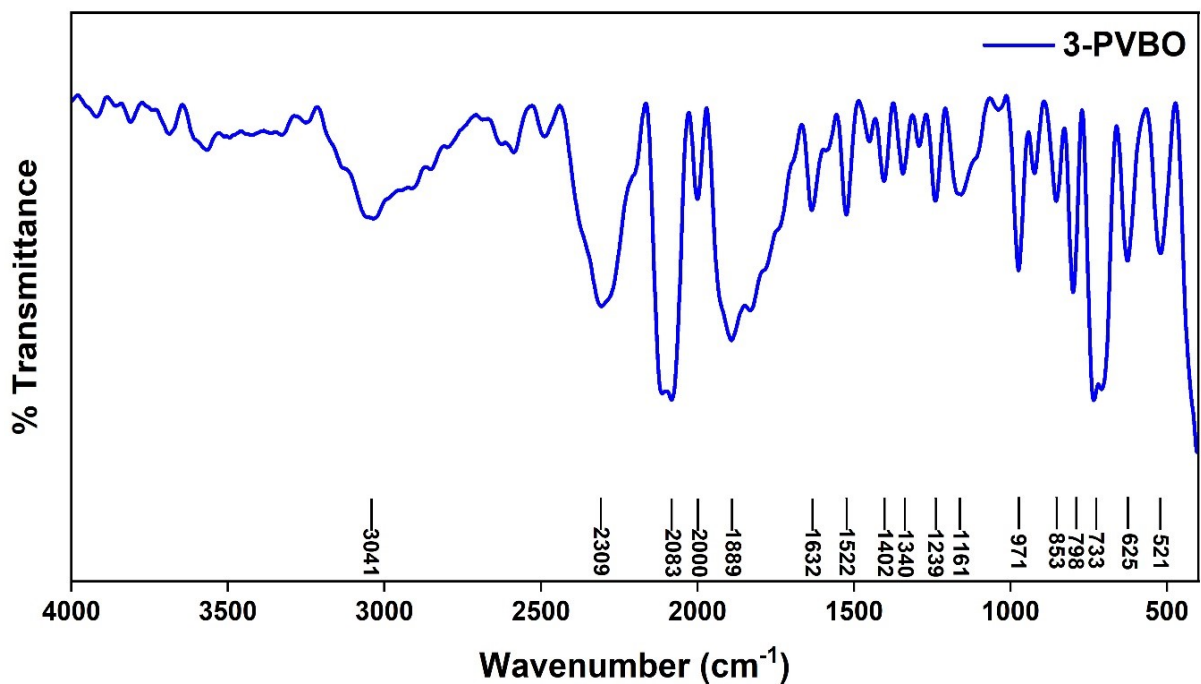

Fig. S25: FT-IR (ATR, cm<sup>-1</sup>) spectrum of 3-PVBO.

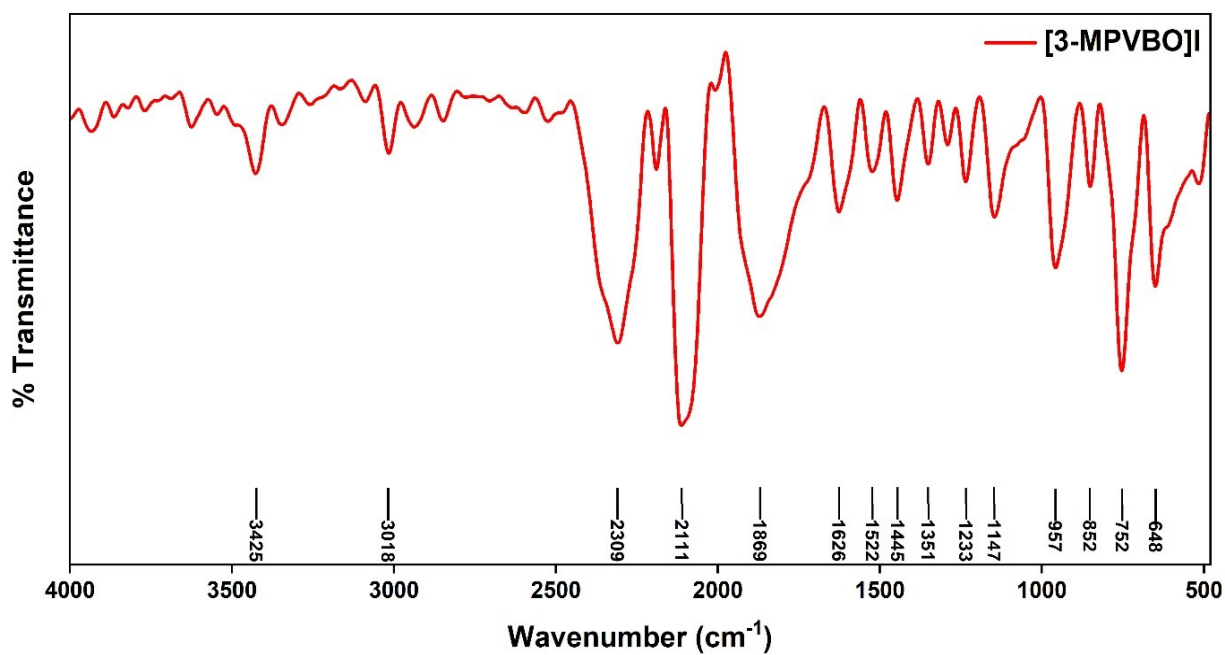

Fig. S26: FT-IR (ATR, cm<sup>-1</sup>) spectrum of [3-MPVBO]I.

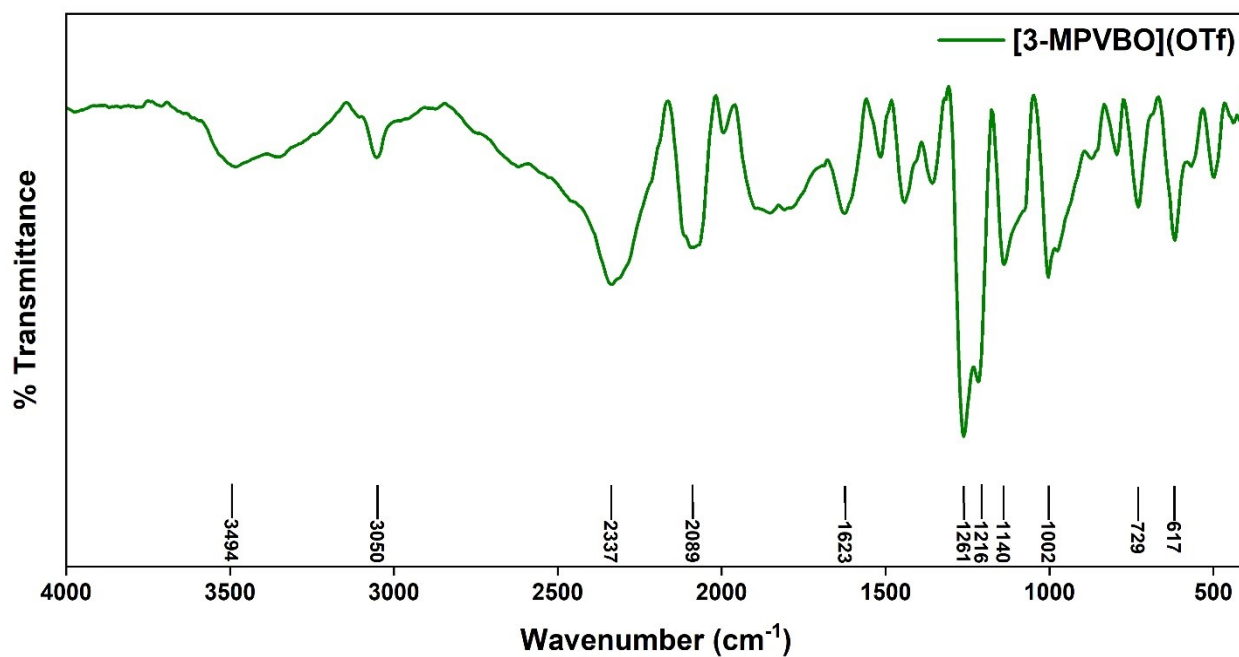

Fig. S27: FT-IR (ATR, cm<sup>-1</sup>) spectrum of [3-MPVBO](OTf).

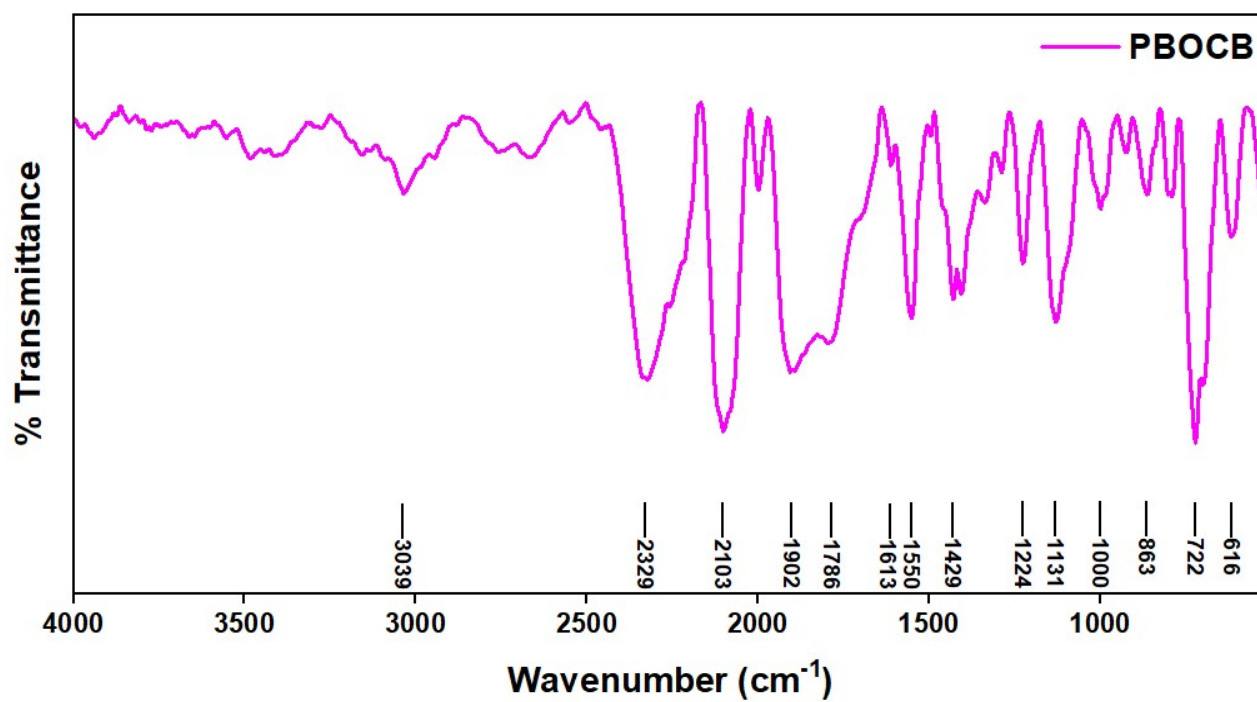

Fig. S28: FT-IR (ATR, cm<sup>-1</sup>) spectrum of PBOCB.

## 7. Thermogravimetric analysis

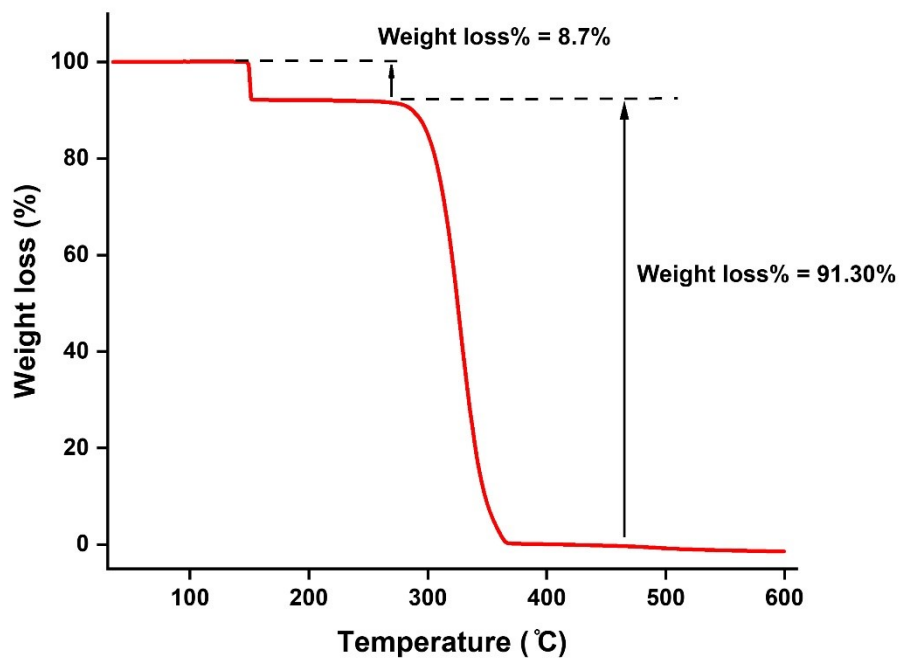

Fig. S29: Thermogravimetric analysis curve of [3-MPVBO]I.



## 8. UV-Vis absorption and emission spectra

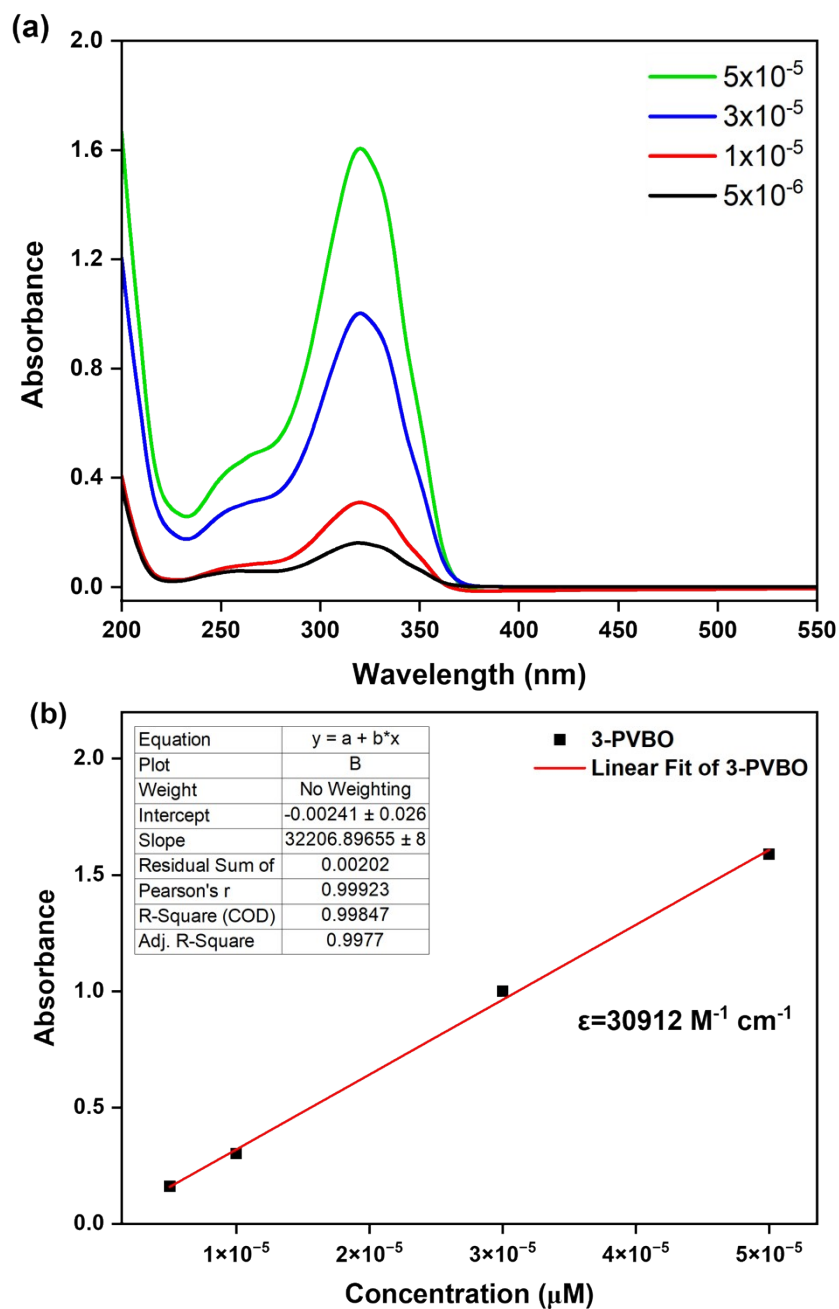

Fig. S30: (a) Absorbance of **3-PVBO** at various concentrations in MeCN; (b) calibration curve for **3-PVBO**.

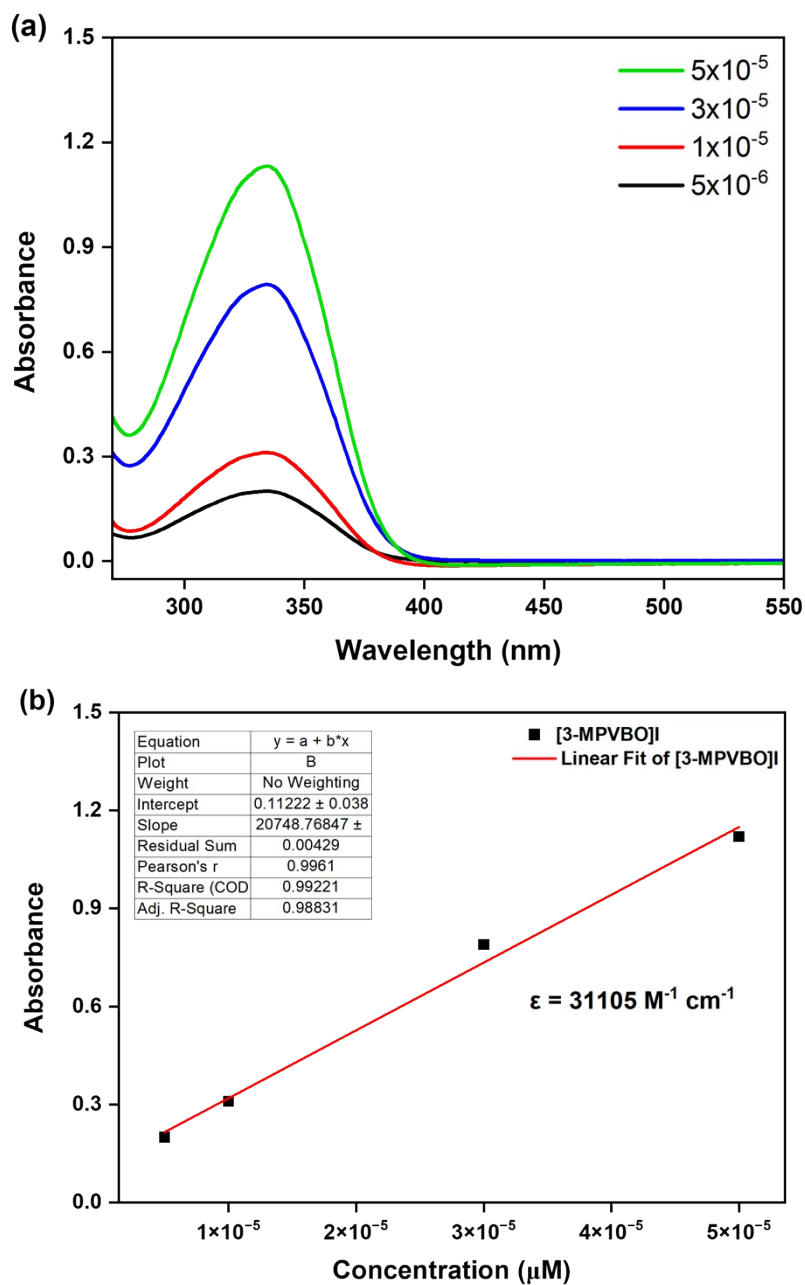

Fig. S31: (a) Absorbance of [3-MPVBO]I at various concentrations in MeCN; (b) calibration curve for [3-MPVBO]I.

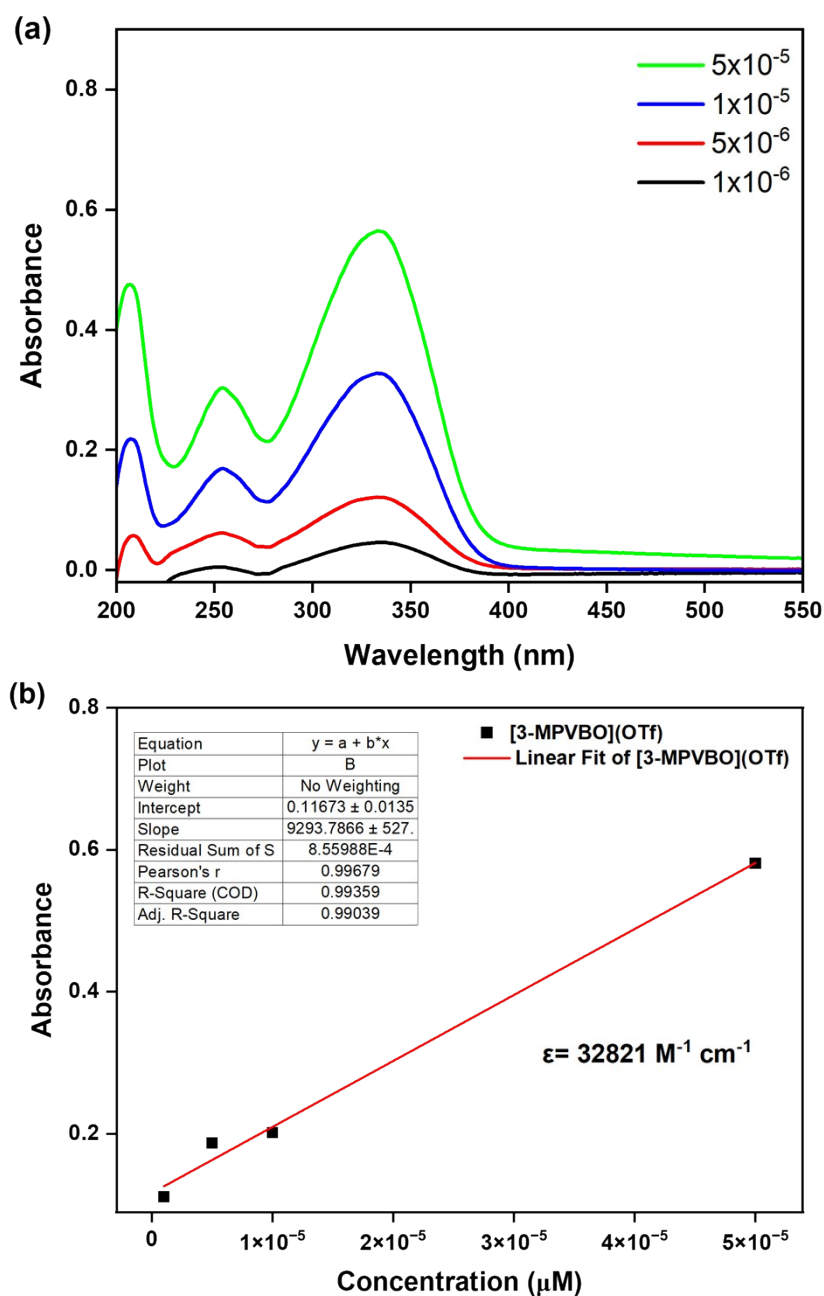

Fig. S32: (a) Absorbance of [3-MPVBO](OTf) at various concentrations in MeCN; (b) calibration curve for [3-MPVBO](OTf).

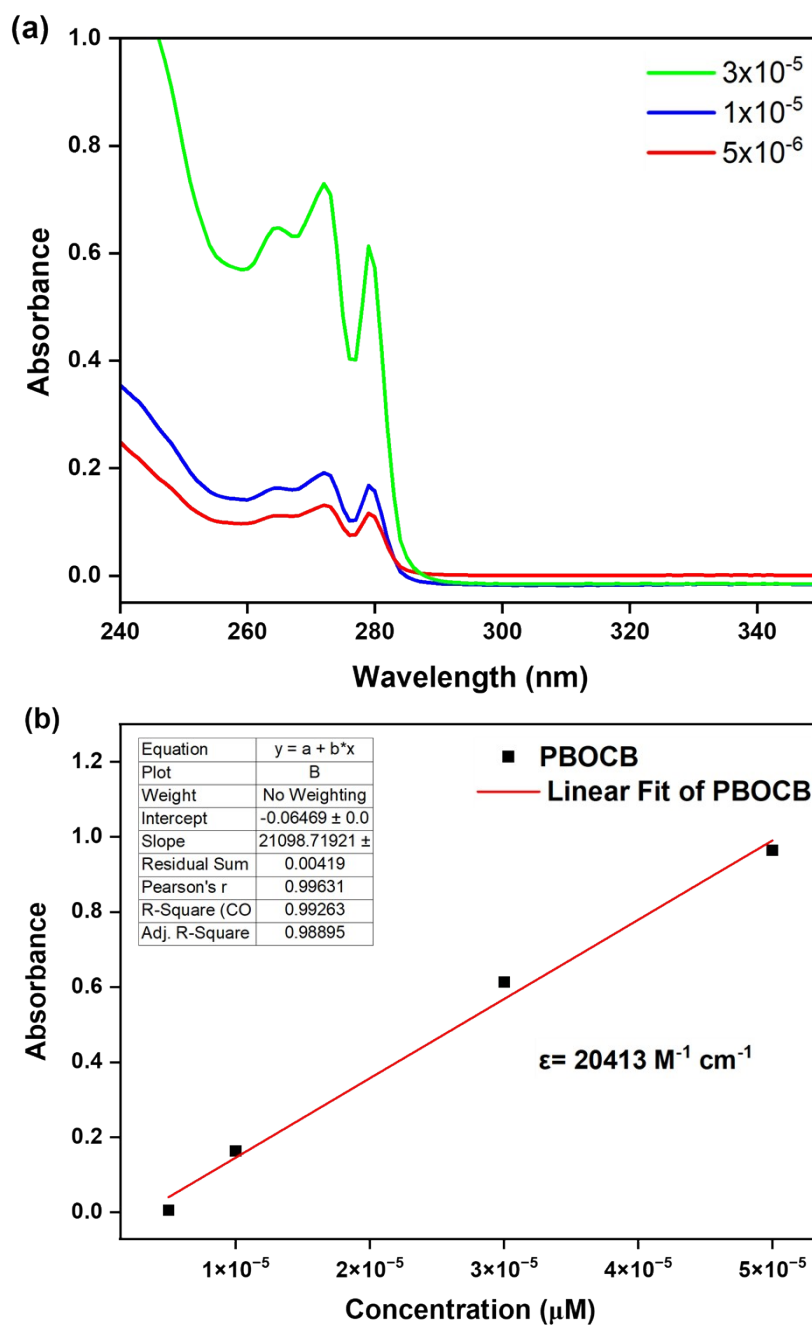

Fig. S33: (a) Absorbance of **PBOCB** at various concentrations in MeCN; (b) calibration curve for **PBOCB**.

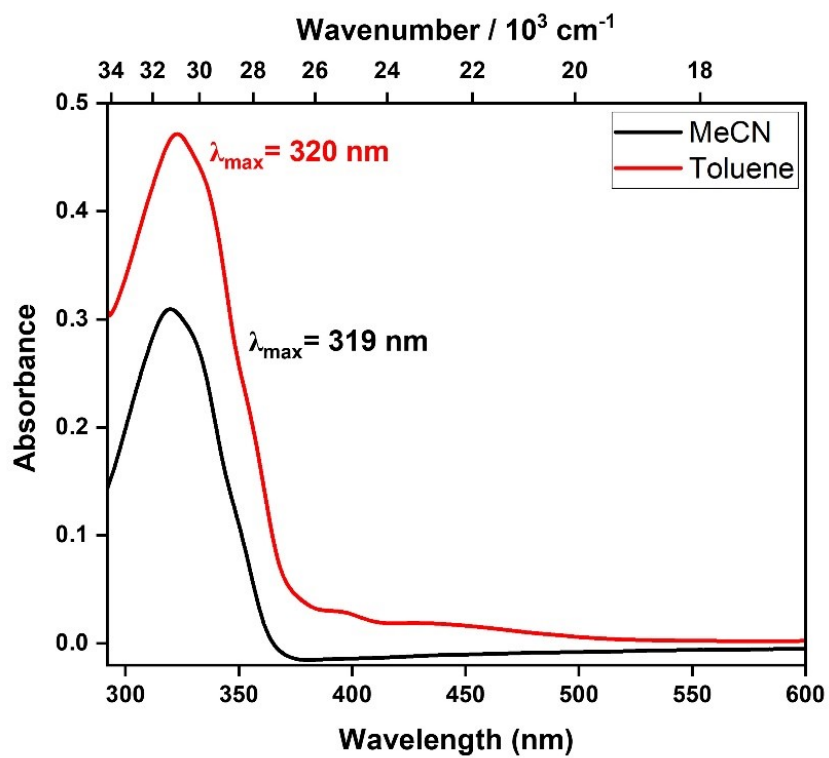

Fig. S34: Absorbance of **3-PVBO** in MeCN and toluene ( $c = 1 \times 10^{-5} \text{ M}$ ).

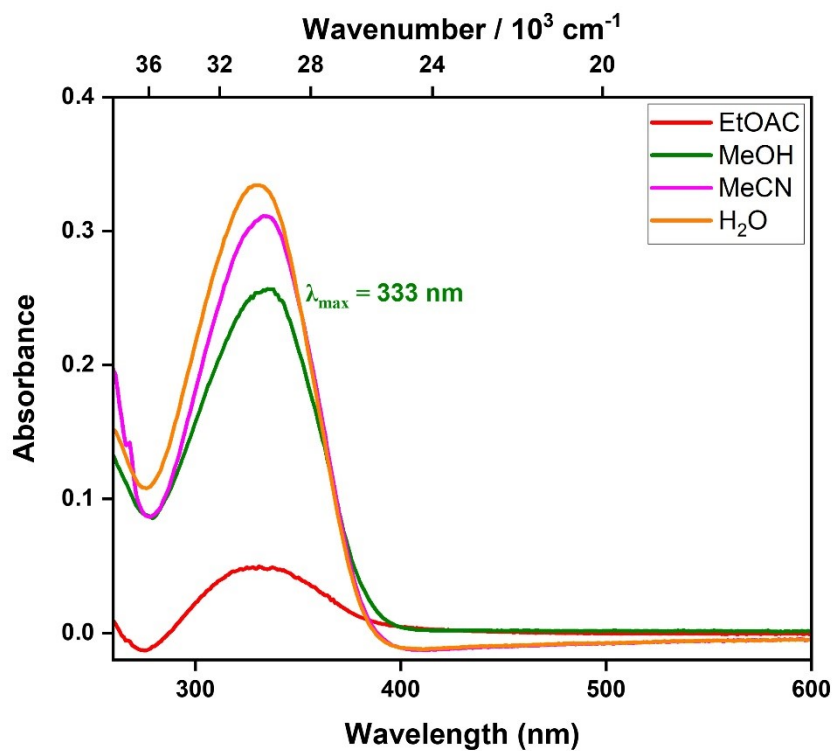

Fig. S35: Absorbance of [**3-MPVBO**]I in different solvents ( $c = 1 \times 10^{-5} \text{ M}$ ).

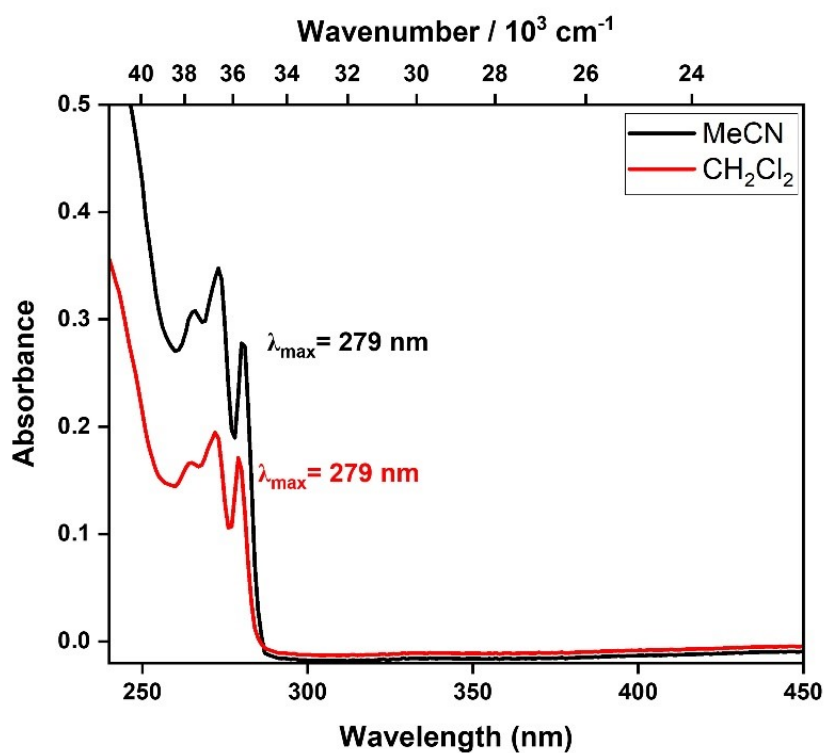

Fig. S36: Absorbance of **PBOCB** in MeCN and  $\text{CH}_2\text{Cl}_2$  ( $c = 1 \times 10^{-5} \text{ M}$ ).

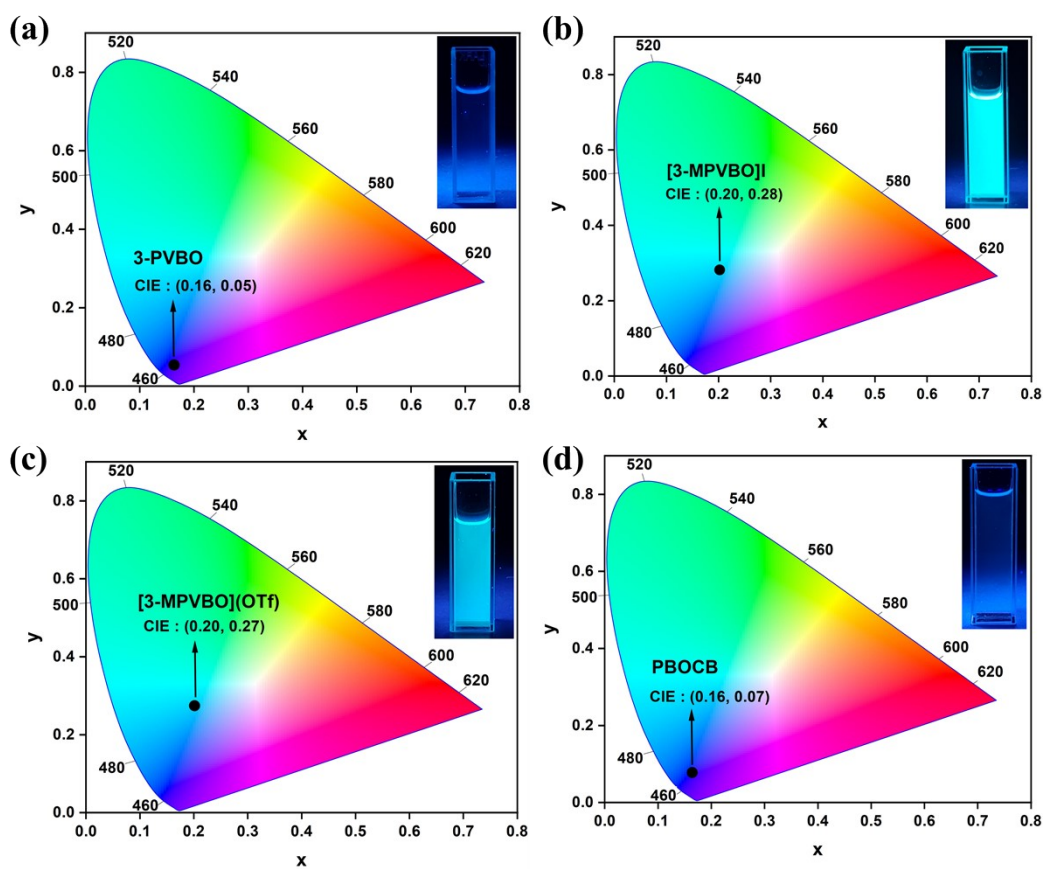

Fig. S37: CIE colour coordinates of (a) **3-PVBO**, (b) **[3-MPVBO]I**, (c) **[3-MPVBO](OTf)** and (d) **PBOCB** in MeCN ( $c = 1 \times 10^{-5} \text{ M}$ ).

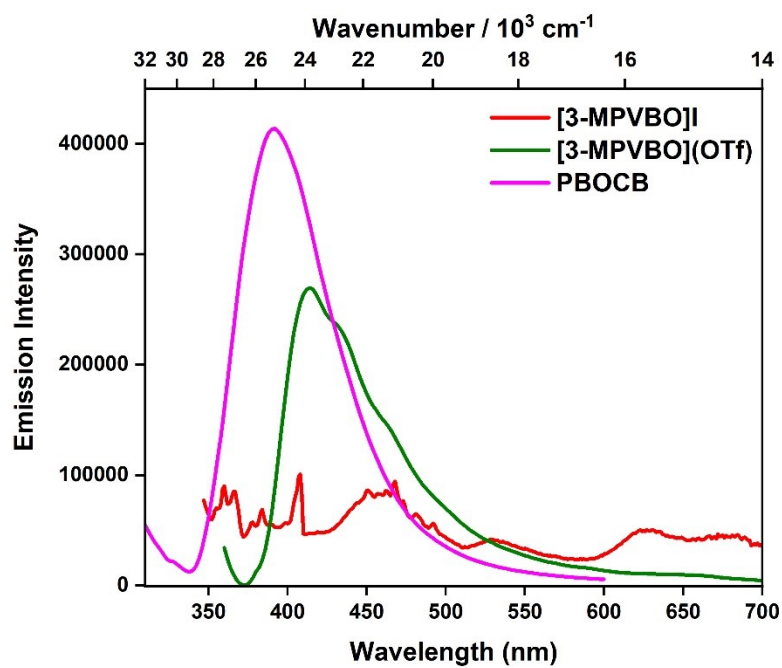

Fig. S38: Emission spectra of [3-MPVBO]I, [3-MPVBO](OTf), PBOCB in the solid state.

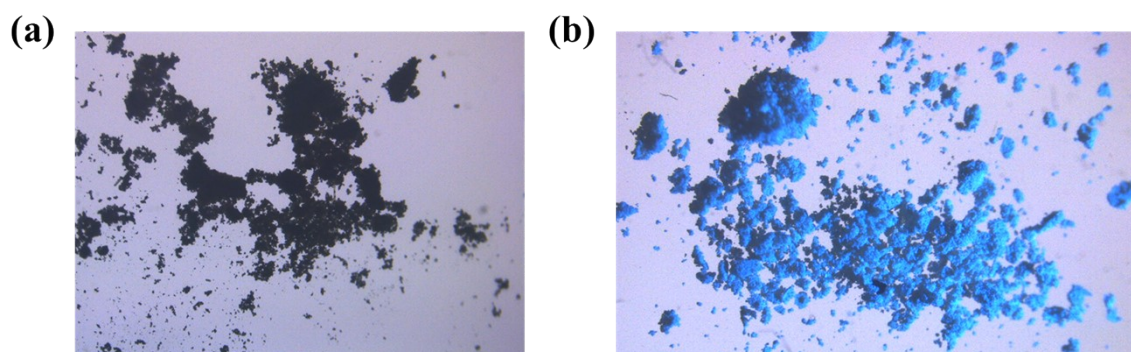

Fig. S39: Photographs of the crystalline solids of (a) [3-MPVBO]I, and (b) [3-MPVBO](OTf) exposed under UV light ( $\lambda \sim 360$  nm).

## 9. Electrochemistry

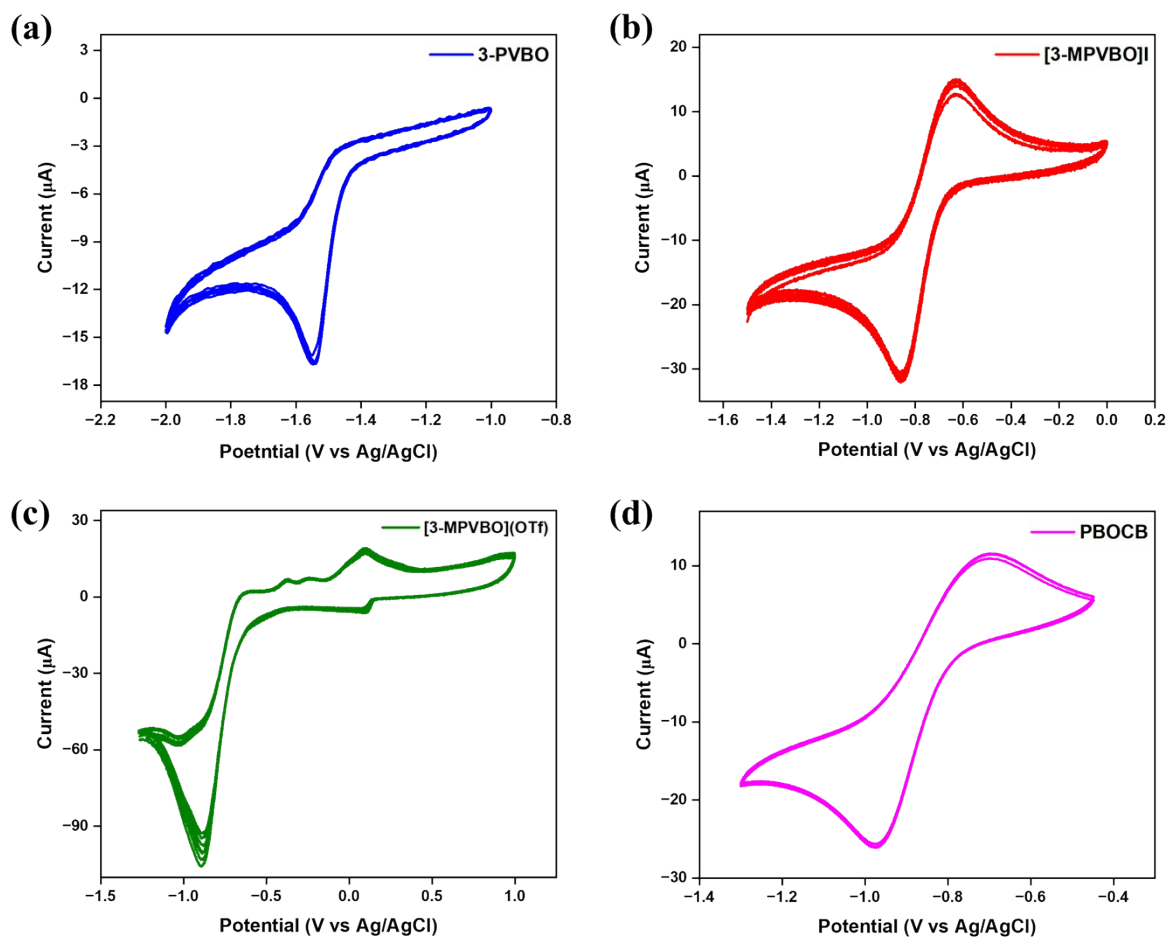

Fig. S40: Cyclic Voltammetry of (a) **3-PVBO**, (b) **[3-MPVBO]I**, (c) **[3-MPVBO](OTf)**, and (d) **PBOCB** at a scan rate of 50 mV/s.



## 10. DFT Calculations

Table S2: Comparison of selected experimentally (crystallography) determined and theoretically optimized (B3LYP/6-31G\*(d) function) structural parameters for **3-PVBO**.

| 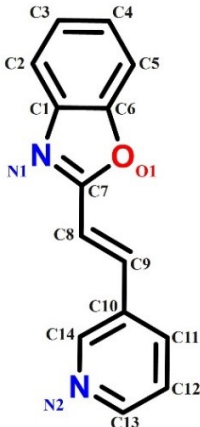 | Atoms                       | Experimental (crystallography) bond length (Å) |                           | Calculated (DFT) bond length (Å) |
|-----------------------------------------------------------------------------------|-----------------------------|------------------------------------------------|---------------------------|----------------------------------|
|                                                                                   | More ordered                | More disordered                                |                           |                                  |
|                                                                                   | C1-C2                       | 1.396                                          | 1.380                     | 1.399                            |
| C1-N1                                                                             | 1.396                       | 1.396                                          | 1.389                     |                                  |
| N1-C7                                                                             | 1.278                       | 1.295                                          | 1.303                     |                                  |
| O1-C7                                                                             | 1.377                       | 1.380                                          | 1.384                     |                                  |
| C8-C9                                                                             | 1.312                       | 1.317                                          | 1.351                     |                                  |
| C14-N2                                                                            | 1.329                       | 1.290                                          | 1.335                     |                                  |
| N2-C13                                                                            | 1.325                       | 1.295                                          | 1.339                     |                                  |
| C6-O1                                                                             | 1.376                       | 1.402                                          | 1.371                     |                                  |
|                                                                                   | Experimental bond angle (°) |                                                | Calculated bond angle (°) |                                  |
| C6-O1-C7                                                                          | 103.64                      | 105.59                                         | 104.27                    |                                  |
| O1-C7-C8                                                                          | 118.36                      | 118.08                                         | 115.84                    |                                  |
| C1-N1-C7                                                                          | 105.10                      | 103.38                                         | 104.76                    |                                  |
| N1-C7-C8                                                                          | 126.69                      | 127.62                                         | 129.44                    |                                  |
| C8-C9-C10                                                                         | 126.07                      | 126.40                                         | 126.83                    |                                  |
| C9-C10-C14                                                                        | 118.53                      | 118.78                                         | 118.75                    |                                  |
| C9-C10-C11                                                                        | 124.78                      | 124.75                                         | 124.69                    |                                  |
| C14-N2-C13                                                                        | 115.57                      | 116.52                                         | 117.36                    |                                  |

Table S3: Comparison of selected experimentally (crystallography) determined and theoretically optimized (B3LYP/6-31G\*(d) function) structural parameters for **[3-MPVBO](OTf)**.

| 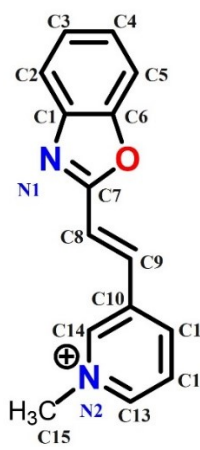 | Atoms                       | Experimental bond length (Å) | Calculated bond length (Å) |
|-------------------------------------------------------------------------------------|-----------------------------|------------------------------|----------------------------|
|                                                                                     | C1-C2                       | 1.389                        | 1.403                      |
|                                                                                     | C1-N1                       | 1.398                        | 1.383                      |
| N1-C7                                                                               | 1.290                       | 1.307                        |                            |
| O1-C7                                                                               | 1.370                       | 1.376                        |                            |
| C6-O1                                                                               | 1.377                       | 1.373                        |                            |
| C8-C9                                                                               | 1.310                       | 1.355                        |                            |
| C14-N2                                                                              | 1.330                       | 1.351                        |                            |
| N2-C13                                                                              | 1.343                       | 1.354                        |                            |
| N2-C15                                                                              | 1.480                       | 1.485                        |                            |
|                                                                                     | Experimental bond angle (°) |                              | Calculated bond angle (°)  |
| C6-O1-C7                                                                            | 103.87                      | 104.01                       |                            |
| O1-C7-C8                                                                            | 118.29                      | 119.40                       |                            |
| C1-N1-C7                                                                            | 104.58                      | 104.64                       |                            |
| N1-C7-C8                                                                            | 126.57                      | 125.48                       |                            |
| C8-C9-C10                                                                           | 124.50                      | 126.04                       |                            |
| C9-C10-C14                                                                          | 121.11                      | 123.46                       |                            |
| C9-C10-C11                                                                          | 121.50                      | 120.31                       |                            |
| C14-N2-C13                                                                          | 121.24                      | 121.55                       |                            |
| C14-N2-C15                                                                          | 118.81                      | 118.40                       |                            |
| C13-N2-C15                                                                          | 119.91                      | 120.04                       |                            |

Table S4: Comparison of selected experimentally (crystallography) determined and theoretically optimized (B3LYP/6-31G\*(d) function) structural parameters for **PBOCB**.

| 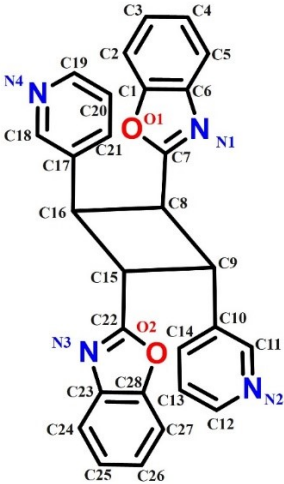 | Atoms      | Experimental bond length (Å) | Calculated bond length (Å) |
|-----------------------------------------------------------------------------------|------------|------------------------------|----------------------------|
|                                                                                   |            | C1-C2                        | 1.369                      |
|                                                                                   | C1-O1      | 1.398                        | 1.375                      |
|                                                                                   | O1-C7      | 1.427                        | 1.379                      |
|                                                                                   | C6-N1      | 1.396                        | 1.397                      |
|                                                                                   | N1-C7      | 1.271                        | 1.297                      |
|                                                                                   | C8-C9      | 1.584                        | 1.586                      |
|                                                                                   | C8-C16     | 1.544                        | 1.556                      |
|                                                                                   | C9-C15     | 1.544                        | 1.585                      |
|                                                                                   | C15-16     | 1.584                        | 1.555                      |
|                                                                                   | C11-N2     | 1.344                        | 1.338                      |
|                                                                                   | N2-C12     | 1.331                        | 1.339                      |
|                                                                                   | C22-O2     | 1.427                        | 1.379                      |
|                                                                                   | C22-N3     | 1.271                        | 1.296                      |
|                                                                                   | N3-C23     | 1.396                        | 1.397                      |
|                                                                                   | C18-N4     | 1.344                        | 1.339                      |
|                                                                                   | N4-C19     | 1.331                        | 1.338                      |
|                                                                                   |            | Experimental bond angle (°)  | Calculated bond angle (°)  |
|                                                                                   | C1-O1-C7   | 102.68                       | 104.30                     |
|                                                                                   | C6-N1-C7   | 103.32                       | 104.72                     |
|                                                                                   | N1-C7-C8   | 133.86                       | 126.88                     |
|                                                                                   | C8-C9-C15  | 89.40                        | 86.73                      |
|                                                                                   | C9-C15-C16 | 90.60                        | 89.56                      |
|                                                                                   | C16-C8-C9  | 90.60                        | 89.48                      |
|                                                                                   | C8-C9-C10  | 117.42                       | 119.81                     |
|                                                                                   | C9-C10-C11 | 119.20                       | 124.44                     |
|                                                                                   | C11-N2-C12 | 115.05                       | 117.77                     |

### Ground state

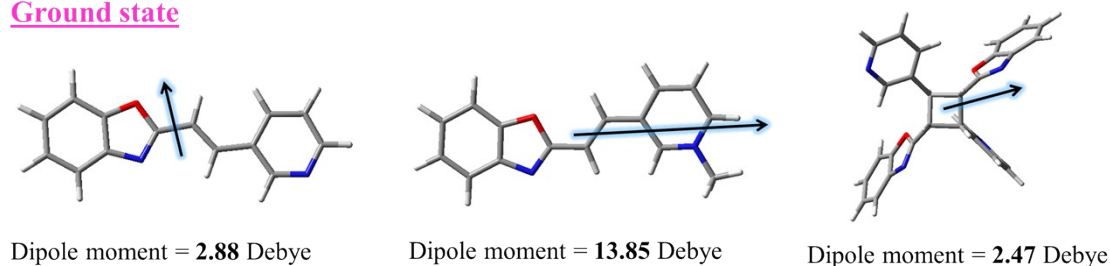

### Excited state

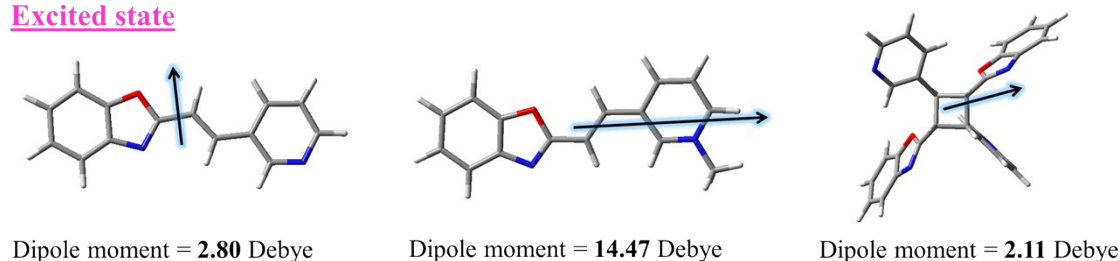

Fig. S41: Computed values and directions of dipole moment for **3-PVBO**, **3-MPVBO** and **PBOCB** in B3LYP/6-31G\*(d) function.

## Catalogue of Cartesian Co-ordinates ground state Optimized Geometries from B3LYP/6-31G\*(d):

### 3-PVBO

|    |   |              |              |              |
|----|---|--------------|--------------|--------------|
| 1  | 6 | -0.049240828 | -0.019311123 | 0.008627157  |
| 2  | 6 | 0.041265833  | -0.001713143 | 0.001518197  |
| 3  | 6 | -0.031603805 | -0.049139491 | 0.004460017  |
| 4  | 6 | 0.027107707  | 0.024034059  | 0.000001525  |
| 5  | 6 | -0.020245028 | 0.024318955  | -0.000556230 |
| 6  | 6 | 0.023116440  | -0.031009175 | 0.001587131  |
| 7  | 6 | 0.036161812  | 0.117958466  | -0.037230330 |
| 8  | 1 | 0.007849754  | 0.002041895  | 0.000078502  |
| 9  | 1 | 0.001545941  | -0.009810911 | -0.000920485 |
| 10 | 1 | -0.002216151 | -0.009275632 | -0.000333979 |
| 11 | 1 | -0.008323010 | 0.000727778  | 0.000356913  |
| 12 | 6 | 0.128838467  | -0.023693382 | 0.049748062  |
| 13 | 1 | -0.031314047 | -0.000249260 | -0.023448877 |
| 14 | 6 | -0.137245250 | -0.006653237 | 0.002393544  |
| 15 | 1 | 0.015797866  | 0.001100745  | 0.013934022  |
| 16 | 6 | 0.031240406  | 0.034567413  | -0.008364258 |
| 17 | 6 | -0.002157895 | -0.037339856 | -0.035925665 |
| 18 | 6 | 0.000298090  | -0.001547019 | -0.009178830 |
| 19 | 1 | -0.001352425 | -0.008246478 | -0.009398057 |
| 20 | 6 | -0.000201662 | -0.000313020 | -0.013111409 |
| 21 | 1 | -0.001720319 | -0.007001424 | 0.005082625  |
| 22 | 6 | -0.000932819 | 0.017541355  | 0.044309797  |
| 23 | 1 | -0.000996088 | -0.000062894 | 0.007554355  |
| 24 | 1 | -0.000108741 | 0.004141980  | 0.012391328  |
| 25 | 7 | 0.005188699  | 0.016798012  | -0.008648602 |
| 26 | 7 | -0.051826338 | -0.041617560 | 0.000964132  |
| 27 | 8 | 0.021073391  | 0.003752945  | -0.005890585 |

### 3-MPVBO

|   |   |             |              |              |
|---|---|-------------|--------------|--------------|
| 1 | 6 | 0.070397863 | 0.002906979  | 0.016200566  |
| 2 | 6 | 0.063218048 | -0.036173913 | -0.000845503 |

|    |   |              |              |              |
|----|---|--------------|--------------|--------------|
| 3  | 6 | -0.069498654 | 0.040914336  | 0.002620825  |
| 4  | 6 | 0.059630664  | 0.026849870  | 0.029400958  |
| 5  | 6 | 0.011848450  | -0.039656591 | -0.008052393 |
| 6  | 6 | -0.061151706 | -0.008540369 | -0.014422140 |
| 7  | 7 | 0.000293522  | 0.040499359  | 0.002181112  |
| 8  | 6 | 0.000404121  | -0.019298911 | 0.002543057  |
| 9  | 8 | -0.001882419 | -0.034934404 | -0.045590123 |
| 10 | 6 | -0.047861791 | 0.039911640  | 0.028910844  |
| 11 | 6 | 0.037276652  | -0.024350778 | -0.014549569 |
| 12 | 6 | -0.011809288 | 0.055349568  | 0.029378471  |
| 13 | 6 | 0.060267397  | -0.000293599 | -0.001521050 |
| 14 | 7 | -0.062068165 | -0.002153843 | 0.000368244  |
| 15 | 6 | -0.019987525 | 0.077946741  | 0.042380769  |
| 16 | 6 | 0.021778910  | -0.059795756 | -0.032644550 |
| 17 | 6 | -0.038094427 | -0.049863632 | -0.025908722 |
| 18 | 1 | -0.004947697 | 0.010105855  | 0.002849407  |
| 19 | 1 | -0.008068723 | -0.006372849 | -0.004704046 |
| 20 | 1 | -0.003855438 | -0.008623691 | -0.005405790 |
| 21 | 1 | -0.002704268 | 0.010469924  | 0.004745906  |
| 22 | 1 | -0.012842308 | -0.011093574 | -0.005580487 |
| 23 | 1 | 0.001226668  | 0.010350227  | 0.005687889  |
| 24 | 1 | 0.009181098  | -0.013444906 | -0.007412493 |
| 25 | 1 | 0.009306457  | -0.003158600 | -0.001881325 |
| 26 | 1 | 0.012289547  | 0.002802958  | 0.001221795  |
| 27 | 1 | -0.007778526 | 0.007749042  | 0.004354216  |
| 28 | 6 | -0.007280293 | 0.003486912  | 0.002017770  |
| 29 | 1 | -0.005520119 | -0.012687194 | 0.008487475  |
| 30 | 1 | -0.005746785 | 0.000194145  | -0.015255788 |
| 31 | 1 | 0.013978735  | 0.000905053  | 0.000424675  |

### **PBOCB**

|    |   |              |              |              |
|----|---|--------------|--------------|--------------|
| 1  | 6 | 0.046454835  | 0.018899065  | -0.080729278 |
| 2  | 6 | -0.058312984 | 0.032595345  | 0.080541522  |
| 3  | 6 | 0.012412155  | -0.050681974 | -0.034485527 |
| 4  | 6 | 0.034106255  | -0.009505433 | -0.061074119 |
| 5  | 6 | -0.032492472 | -0.017383843 | 0.056509334  |
| 6  | 6 | -0.019050775 | -0.049172796 | 0.033830157  |
| 7  | 6 | 0.006132432  | 0.029185139  | -0.027494732 |
| 8  | 1 | -0.005703853 | -0.004269996 | 0.008965228  |
| 9  | 1 | -0.001236983 | 0.010382498  | 0.003772807  |
| 10 | 1 | 0.001069310  | 0.011610105  | -0.001154510 |
| 11 | 1 | 0.005479612  | -0.004396073 | -0.009323521 |
| 12 | 6 | 0.042933657  | 0.073079573  | -0.057244042 |
| 13 | 6 | -0.067917128 | -0.048888831 | 0.100809680  |
| 14 | 1 | -0.018414358 | -0.002950712 | 0.015744085  |
| 15 | 6 | -0.000706085 | 0.011931503  | -0.023186615 |
| 16 | 6 | -0.011355086 | -0.008898883 | 0.012942388  |
| 17 | 6 | 0.036843044  | -0.004368312 | 0.008794276  |
| 18 | 6 | -0.006814653 | -0.000694841 | 0.001054120  |
| 19 | 1 | 0.008854475  | 0.004231974  | -0.005790900 |
| 20 | 1 | -0.013293849 | -0.002478596 | 0.002491031  |
| 21 | 6 | -0.004983269 | 0.019693993  | -0.030844742 |
| 22 | 1 | 0.012188819  | -0.001732171 | 0.003049961  |
| 23 | 1 | -0.002814612 | -0.007297790 | 0.011315017  |
| 24 | 7 | 0.000333513  | 0.019461104  | 0.031755440  |
| 25 | 7 | -0.014580935 | -0.007027880 | 0.010996772  |
| 26 | 8 | 0.047781154  | 0.018234724  | -0.020576901 |
| 27 | 1 | 0.016168645  | -0.002121439 | 0.002737656  |
| 28 | 6 | -0.000491465 | 0.032099073  | -0.051338416 |
| 29 | 1 | 0.019295095  | -0.007126462 | -0.003768998 |
| 30 | 6 | -0.041442718 | -0.012957160 | 0.007672454  |
| 31 | 6 | -0.004076439 | -0.018834579 | 0.014627348  |

|    |   |              |              |              |
|----|---|--------------|--------------|--------------|
| 32 | 6 | -0.016661572 | 0.006998148  | -0.001060248 |
| 33 | 6 | 0.035068886  | 0.015769648  | -0.032008474 |
| 34 | 6 | -0.005031666 | 0.001390569  | 0.005151685  |
| 35 | 1 | 0.010998445  | -0.006510504 | -0.000135616 |
| 36 | 1 | 0.007156633  | 0.021382289  | -0.008425055 |
| 37 | 6 | 0.013765122  | -0.022584154 | 0.026780712  |
| 38 | 1 | 0.007494987  | 0.000911653  | -0.010275386 |
| 39 | 1 | -0.008729375 | 0.008240972  | -0.006888214 |
| 40 | 7 | -0.017077989 | 0.011518497  | -0.001124530 |
| 41 | 6 | -0.009784571 | 0.009946973  | 0.014786240  |
| 42 | 7 | -0.010173316 | 0.004621012  | -0.028509676 |
| 43 | 8 | -0.032245179 | -0.081423806 | 0.018761260  |
| 44 | 6 | -0.015788622 | -0.070897157 | 0.059458844  |
| 45 | 6 | 0.045429747  | 0.039670593  | -0.016079667 |
| 46 | 6 | -0.040503448 | 0.069274305  | -0.066160885 |
| 47 | 6 | 0.046936635  | -0.009566143 | 0.039283884  |
| 48 | 6 | 0.013858037  | 0.051857401  | -0.041117480 |
| 49 | 6 | 0.011638384  | -0.048009859 | 0.050751431  |
| 50 | 1 | -0.010787663 | -0.020825007 | 0.000925726  |
| 51 | 1 | 0.003890913  | 0.009112478  | -0.005983839 |
| 52 | 1 | -0.009726464 | -0.000234957 | -0.005402267 |
| 53 | 1 | -0.010672589 | -0.004257690 | -0.001568313 |
| 54 | 1 | 0.004579331  | -0.007001587 | 0.008242897  |

**Catalogue of Cartesian Co-ordinates ground state Optimized Geometries from Cam-B3LYP/6-31G\*(d):**

**3-PVBO**

|    |   |              |              |              |
|----|---|--------------|--------------|--------------|
| 1  | 6 | 0.080444771  | 0.023270231  | -0.025446147 |
| 2  | 6 | -0.068834563 | 0.008561567  | 0.066240807  |
| 3  | 6 | 0.027141240  | -0.039177739 | -0.045676071 |
| 4  | 6 | 0.066847156  | 0.010280147  | -0.037614471 |
| 5  | 6 | -0.065416101 | -0.028767011 | 0.020950397  |
| 6  | 6 | -0.033630486 | -0.037642373 | -0.008459680 |
| 7  | 6 | -0.001320010 | -0.024230737 | -0.000280194 |
| 8  | 1 | -0.019984230 | -0.008165903 | 0.007634954  |
| 9  | 1 | 0.002883635  | 0.001546213  | -0.003223526 |
| 10 | 1 | 0.005709660  | 0.011283681  | 0.005205608  |
| 11 | 1 | 0.000905156  | -0.002919888 | -0.002139968 |
| 12 | 6 | 0.034345128  | 0.030529993  | 0.045985512  |
| 13 | 1 | -0.016857994 | -0.002007757 | 0.006419761  |
| 14 | 6 | -0.030230567 | -0.022627402 | -0.036821812 |
| 15 | 1 | 0.014469276  | 0.006992470  | -0.000308789 |
| 16 | 6 | 0.013485267  | 0.024586575  | 0.021898258  |
| 17 | 6 | 0.069743001  | -0.064876801 | -0.054858039 |
| 18 | 6 | -0.016274740 | -0.007686510 | -0.002204541 |
| 19 | 1 | -0.002223511 | -0.015716025 | 0.011346000  |
| 20 | 6 | -0.047606505 | 0.009147365  | 0.019752965  |
| 21 | 1 | -0.015373277 | -0.000266205 | -0.001206792 |
| 22 | 6 | 0.028852991  | -0.008435343 | 0.104056663  |
| 23 | 1 | 0.010795022  | 0.003896156  | -0.013556215 |
| 24 | 1 | -0.002838759 | -0.019727656 | 0.010607192  |
| 25 | 7 | -0.028697876 | 0.090792436  | -0.066760143 |
| 26 | 7 | -0.024112819 | 0.030798253  | 0.013024887  |
| 27 | 8 | 0.017779133  | 0.030562262  | -0.034566617 |

### **3-MPVBO**

|    |   |              |              |              |
|----|---|--------------|--------------|--------------|
| 1  | 6 | 0.004881412  | 0.001936761  | 0.000081635  |
| 2  | 6 | 0.004529160  | -0.001698295 | -0.000034517 |
| 3  | 6 | 0.001120324  | -0.005553159 | 0.000011200  |
| 4  | 6 | -0.003699284 | -0.006743098 | -0.000012720 |
| 5  | 6 | 0.000170296  | 0.005934727  | -0.000023560 |
| 6  | 6 | -0.002908536 | 0.004888238  | -0.000029213 |
| 7  | 7 | 0.008751988  | -0.010524870 | 0.000012938  |
| 8  | 6 | -0.016055723 | 0.001872788  | 0.000033994  |
| 9  | 8 | 0.000063097  | 0.008864816  | 0.000012478  |
| 10 | 6 | 0.011465009  | -0.007964175 | -0.000042921 |
| 11 | 6 | -0.010309403 | 0.007886953  | -0.000010695 |
| 12 | 6 | 0.010457856  | 0.001290612  | 0.000003823  |
| 13 | 6 | 0.001338779  | -0.006495158 | 0.000002562  |
| 14 | 7 | 0.000036054  | -0.003438599 | 0.000007891  |
| 15 | 6 | -0.007756171 | 0.000701791  | 0.000005062  |
| 16 | 6 | -0.000429080 | 0.004971605  | -0.000004107 |
| 17 | 6 | -0.000271078 | 0.006428748  | -0.000001345 |
| 18 | 1 | 0.000567605  | 0.000441600  | -0.000015445 |
| 19 | 1 | 0.000653216  | -0.000256285 | -0.000009690 |
| 20 | 1 | 0.000082350  | -0.000628273 | 0.000005774  |
| 21 | 1 | -0.000020002 | 0.000671277  | -0.000003241 |
| 22 | 1 | -0.000130881 | -0.000517366 | 0.000010298  |
| 23 | 1 | -0.000153718 | 0.000589262  | 0.000006752  |
| 24 | 1 | 0.000056946  | -0.000247240 | -0.000000277 |
| 25 | 1 | -0.000291953 | 0.000013050  | -0.000000042 |
| 26 | 1 | -0.000353185 | 0.000478623  | 0.000000148  |
| 27 | 1 | 0.000164430  | 0.000478840  | 0.000000173  |
| 28 | 6 | -0.001681819 | -0.002058855 | 0.000010763  |
| 29 | 1 | 0.000207934  | -0.000631501 | 0.000593282  |
| 30 | 1 | 0.000191269  | -0.000625632 | -0.000614138 |
| 31 | 1 | -0.000676894 | -0.000067186 | 0.000003135  |

### **PBOCB**

|    |   |              |              |              |
|----|---|--------------|--------------|--------------|
| 1  | 6 | -0.000684798 | -0.001126448 | -0.004839231 |
| 2  | 6 | 0.001075436  | 0.000703213  | 0.003625371  |
| 3  | 6 | 0.003890618  | -0.000060950 | 0.003568695  |
| 4  | 6 | -0.003370077 | 0.001819248  | 0.003405846  |
| 5  | 6 | -0.004445228 | 0.001418045  | 0.000950392  |
| 6  | 6 | -0.002480720 | -0.000626601 | -0.004542070 |
| 7  | 6 | 0.007321964  | -0.003146305 | -0.002525952 |
| 8  | 1 | 0.000316478  | 0.000107211  | 0.000677542  |
| 9  | 1 | -0.000326412 | 0.000274948  | 0.000664791  |
| 10 | 1 | -0.000774157 | 0.000208348  | 0.000015546  |
| 11 | 1 | -0.000443758 | -0.000045427 | -0.000601563 |
| 12 | 6 | -0.004953312 | -0.000997084 | -0.000045346 |
| 13 | 6 | 0.000056144  | -0.001868187 | 0.002327156  |
| 14 | 1 | -0.000027777 | 0.000211939  | 0.000655188  |
| 15 | 6 | -0.000058237 | 0.004070420  | -0.000144035 |
| 16 | 6 | -0.004822274 | 0.001739185  | 0.000128342  |
| 17 | 6 | 0.004349457  | 0.002300957  | -0.000449694 |
| 18 | 6 | -0.004215399 | -0.002687141 | 0.000513689  |
| 19 | 1 | -0.000479216 | 0.000112762  | 0.000026996  |
| 20 | 1 | 0.000590347  | 0.000215883  | -0.000047978 |
| 21 | 6 | -0.000589895 | -0.005098629 | 0.000639332  |
| 22 | 1 | -0.000829457 | -0.000432003 | 0.000077470  |
| 23 | 1 | -0.000008295 | -0.000969504 | 0.000113551  |
| 24 | 7 | -0.007705790 | 0.000233982  | -0.006360839 |
| 25 | 7 | 0.006150371  | -0.003250250 | 0.000025484  |

|    |   |              |              |              |
|----|---|--------------|--------------|--------------|
| 26 | 8 | 0.004437760  | 0.000619388  | 0.006789486  |
| 27 | 1 | -0.000114918 | -0.000337070 | -0.000818462 |
| 28 | 6 | 0.000070231  | 0.003975851  | -0.003348621 |
| 29 | 1 | -0.000017242 | -0.000103483 | -0.001022098 |
| 30 | 6 | 0.004751770  | -0.001077061 | 0.000003392  |
| 31 | 6 | 0.000029981  | -0.004242023 | -0.001341511 |
| 32 | 6 | -0.000097538 | -0.000184583 | -0.005064742 |
| 33 | 6 | 0.000103193  | -0.003337076 | 0.003403865  |
| 34 | 6 | -0.000098681 | 0.003644970  | -0.003451174 |
| 35 | 1 | -0.000014499 | -0.000115265 | -0.000753851 |
| 36 | 1 | 0.000003387  | -0.000130925 | 0.000381266  |
| 37 | 6 | -0.000028944 | 0.005097572  | 0.001073360  |
| 38 | 1 | -0.000018942 | 0.000654356  | -0.000677816 |
| 39 | 1 | -0.000002909 | 0.000936049  | 0.000266245  |
| 40 | 7 | 0.000126601  | 0.001434180  | 0.006674731  |
| 41 | 6 | -0.007236028 | -0.003233304 | -0.002468243 |
| 42 | 7 | 0.007523033  | 0.000840454  | -0.006501216 |
| 43 | 8 | -0.004277528 | 0.000044808  | 0.006901744  |
| 44 | 6 | 0.000601851  | -0.000808689 | -0.004910696 |
| 45 | 6 | 0.002388159  | -0.000267472 | -0.004627156 |
| 46 | 6 | -0.001014002 | 0.000441468  | 0.003696899  |
| 47 | 6 | -0.003788915 | -0.000406474 | 0.003648880  |
| 48 | 6 | 0.004416877  | 0.001508648  | 0.000923183  |
| 49 | 6 | 0.003389076  | 0.001726359  | 0.003431177  |
| 50 | 1 | 0.000106289  | -0.000328124 | -0.000832707 |
| 51 | 1 | -0.000305658 | 0.000054731  | 0.000694173  |
| 52 | 1 | 0.000334653  | 0.000244785  | 0.000674899  |
| 53 | 1 | 0.000768267  | 0.000233964  | 0.000010438  |
| 54 | 1 | 0.000428660  | 0.000006355  | -0.000614126 |
